# Supplementary material for: Quality assessment of controlled clinical trials published in Orthopaedics and Traumatology journals in Spanish: An observational study through handsearching and evidence mapping
Source: PubMed Central journal article supplement — SAGE Open Med. 2018 Oct 3;6:2050312118801710. doi: 10.1177/2050312118801710 (PMC6170956; doi:10.1177/2050312118801710), 2018-10-03
Supplement: SAGE_Medicine_Supplemental_files_1_to_3_revised_130818.pdf [file SAGE_Medicine_Supplemental_files_1_to_3_revised_130818.pdf]

**Supplemental file 1. Eligible journals, articles assessed and controlled clinical trials included.**

| <i><b>JOURNAL</b></i>                                                 | <i><b>CCT</b></i> | <i><b>Total</b></i> |
|-----------------------------------------------------------------------|-------------------|---------------------|
| Revista Argentina de Artroscopia                                      | 1                 | 252                 |
| Revista de la Asociación Argentina de Ortopedia y Traumatología       | 7                 | 523                 |
| Revista de la Sociedad de Ortopedia y Traumatología del Conurbano Sur | Not available     |                     |
| Revista Chilena de Ortopedia y Traumatología                          | 2                 | 165                 |
| Revista Colombiana de Ortopedia y Traumatología                       | 4                 | 374                 |
| Revista Acta Médica Costarricense                                     | 0                 | 595                 |
| Revista Cubana de Ortopedia y Traumatología                           | 3                 | 171                 |
| Revista Ecuatoriana de Ortopedia y Traumatología                      | Not available     |                     |
| El peu                                                                | 0                 | 30                  |
| Osteopatía científica                                                 | 0                 | 38                  |
| Revista de biomecánica                                                | 0                 | 213                 |
| Revista de la Sociedad Andaluza de Traumatología y Ortopedia          | 0                 | 134                 |
| TOI-Técnica ortopédica internacional                                  | 0                 | 20                  |
| Aparato Locomotor                                                     | 1                 | 216                 |
| Cuadernos de Artroscopia                                              | 0                 | 123                 |
| Revista de Patología de la Rodilla                                    | Not available     |                     |
| Revista Española de Cirugía Ortopédica y Traumatología                | 17                | 766                 |
| Revista Española de Cirugía Osteoarticular                            | 1                 | 125                 |
| Técnicas Quirúrgicas en Ortopedia y Traumatología                     | 0                 | 100                 |
| Acta Ortopédica Mexicana                                              | 19                | 1071                |
| Investigación en Discapacidad                                         | 0                 | 27                  |
| ORTHO-TIPS                                                            | 0                 | 137                 |
| Revista Mexicana de Ortopedia Pediátrica                              | 0                 | 44                  |
| Trauma                                                                | 1                 | 58                  |
| Revista Venezolana de Cirugía Ortopédica y Traumatología              | Not available     |                     |
| Metabolismo óseo y mineral                                            | 0                 | 62                  |
| PROATO. Programa de Actualización en Traumatología y Ortopedia        | Not available     |                     |
| Revista Española de Podología                                         | 0                 | 86                  |
| Trauma-MAPFRE                                                         | 1                 | 301                 |
| <b>Total (29 journals)</b>                                            | <b>57</b>         | <b>5631</b>         |

## Supplemental file 2. PICO information for included controlled clinical trials

| Author, year                | Subspecialty | Topic                   | Population                                                                                                                | Intervention                                                                                                                                         | Comparator                                            | Outcome 1                                         | Outcome 2                                       | Outcome 3                 | Outcome 4                  | Outcome 5 <sup>a</sup>                      |
|-----------------------------|--------------|-------------------------|---------------------------------------------------------------------------------------------------------------------------|------------------------------------------------------------------------------------------------------------------------------------------------------|-------------------------------------------------------|---------------------------------------------------|-------------------------------------------------|---------------------------|----------------------------|---------------------------------------------|
| Almaraz 2002 <sup>1</sup>   | Trauma       | Immune stimulation      | Patients with exposed fracture of long bones, cranioccephalic traumatism, penetrating wound of the thorax and/or abdomen. | GB-100 (2 capsules of 500 mg orally every 8 hours)                                                                                                   | Placebo                                               | Hemoglobin levels                                 | Hematocrit levels                               | Phagocytic index          | Hospital stay              | Post-surgical infections                    |
| Amenabar 2015 <sup>2</sup>  | Hip          | Surgical Hemostasis     | Patients with total hip replacement indication due to osteoarthritis                                                      | Tranexamic acid- bolus (20 mg/kg 5 minutes preoperatively)<br>Tranexamic acid- continuous (40 mg/kg continuous infusion for 6 hours postoperatively) | Placebo (20 ml saline)                                | Intraoperative bleeding                           | Drainage blood loss                             | Total blood loss          | Need for transfusion       |                                             |
| Alonso 2007 <sup>3</sup>    | Spine        | Ozone therapy           | Patients with low back pain or sciatic pain                                                                               | Ozone treatment                                                                                                                                      | Rest and analgesia                                    | Pain (scale of severity)                          | Oswestry Low Back Pain Disability Questionnaire | Hand-flow distance        | Lassegue test              | Reinsertion of patients to labor activities |
| Arismendi 2011 <sup>4</sup> | Shoulder     | Suture Anchors          | Patients diagnosed with acute acromioclavicular dislocations grades III to V according to the Rockwood classification     | Coracoclavicular suture anchors                                                                                                                      | Direct acromioclavicular reduction using a hook plate | Recurrence rate                                   | Shoulder Functionality: Constant score          |                           |                            |                                             |
| Arteaga 2015 <sup>5</sup>   | Knee         | Regeneration procedures | Patients with knee osteoarthritis grades II y III according the Kellgren and Lawrence's classification                    | Intraarticular injections of Collagen PVP (6 doses)                                                                                                  | Intraarticular injections of hylan GF-20 (3 doses)    | International Knee Documentation Committee (IKDC) | pain: VAS scores                                |                           |                            |                                             |
| Aviña 2009 <sup>6</sup>     | Foot & ankle | Tenotomy                | Patients with acute rupture of the Achilles tendon                                                                        | Minimally-invasive surgery assisted with a mechanical guide                                                                                          | Lynn's technique                                      | Pain: VAS score                                   | Muscle strength                                 | Mobility in extension     | Flexion                    | Amyotrophy                                  |
| Bidolegui 2014 <sup>7</sup> | Knee         | Surgical Hemostasis     | Patients with primary gonarthrosis                                                                                        | Total knee arthroplasty + tranexamic acid 15mg/kg diluted in 100 cc of saline solution IV (2 doses)                                                  | Total knee arthroplasty + tourniquet                  | Postoperative hematocrit level                    | Hemoglobin values                               | Drainage                  | Transfusionnal requirement | Surgical time                               |
| Boretto 2006 <sup>8</sup>   | Hand         | Tenotomy                | Patients with carpal tunnel syndrome                                                                                      | Mini-open carpal tunnel technique for surgical release                                                                                               | Open carpal tunnel technique for surgical release     | Pain and pillar pain                              | Numbness                                        | Grip and pinch-pulp       |                            |                                             |
| Bosch 1999 <sup>9</sup>     | Pediatric    | Foot Orthoses           | Children 3 to 5 years of age diagnosed with flexible flat foot                                                            | internal wedges in orthopedic shoes, shoe inserts                                                                                                    | Control group                                         | Correction of flat foot flexible in children      | Diagnosis of flat foot                          | Optimal age for diagnosis |                            |                                             |
| Calderon 2013 <sup>10</sup> | Hip          | Fracture Fixation       | Patients with a Boyd & Griffin type II intertrochanteric fracture                                                         | Proximal femoral nail                                                                                                                                | DHS plate                                             | Harris scale                                      | Pain: VAS scores                                | Operative time            | Incision size              | Intraoperative bleeding                     |

| Author, year                        | Subspecialty | Topic                                     | Population                                                                                                                                           | Intervention                                                                           | Comparator                                                                            | Outcome 1                                 | Outcome 2                                       | Outcome 3                                                | Outcome 4                           | Outcome 5 <sup>a</sup> |
|-------------------------------------|--------------|-------------------------------------------|------------------------------------------------------------------------------------------------------------------------------------------------------|----------------------------------------------------------------------------------------|---------------------------------------------------------------------------------------|-------------------------------------------|-------------------------------------------------|----------------------------------------------------------|-------------------------------------|------------------------|
| Calvo 2016 <sup>11</sup>            | Knee         | Nerve Block                               | Patients underwent ACL reconstruction with an autograft                                                                                              | single dose FNB with bupivacaine diluted in 10 mL saline solution                      | continuous FNB infusion with bupivacaine and epinephrine (1:300.000) for 48 hours     | Pain                                      | Thigh hypo-aesthesia                            | Need for additional anesthesia                           |                                     |                        |
| Carriedo 2002 <sup>12</sup>         | Knee         | Arthroplasty, Replacement                 | Patients with primary osteoarthritis, osteoarthritis because of angular deformity, traumatic arthritis, rheumatoid arthritis and metabolic arthritis | Total knee prosthesis, condylar type, preserving the PCL (posterior cruciate ligament) | Total knee prosthesis, condylar type, removing the PCL (posterior cruciate ligament)  | Maximum operating time                    | Trans operative bleeding                        | Absence of pain                                          | Need of a cane for walking          | Normal range of motion |
| Castro-Menendez 2016 <sup>13</sup>  | Knee/Hip     | Surgical Hemostasis                       | Patients undergoing knee or hip arthroplasty                                                                                                         | 1 g iv. Intraoperative tranexamic acid + 1 g iv. after 3h of surgery                   | 2 g iv. of tranexamic acid 30 min before surgery                                      | Postoperative blood loss                  | Transfusion rate                                | Thromboembolic complications                             |                                     |                        |
| Castro-Menendez 2016b <sup>14</sup> | Hand         | Tenotomy                                  | Patients with Carpal tunnel syndrome                                                                                                                 | Z-lengthening of TCL according to a modified Simonetta technique                       | Complete release of transverse carpal ligament (TCL)                                  | Grip strength                             | Pillar pain                                     | Clinical and functional assessment: Levine questionnaire |                                     |                        |
| Cervera-Irimia 2013 <sup>15</sup>   | Spine        | Epidural injection                        | Patients with chronic low back disc pain                                                                                                             | Fluoroscopy guided caudal epidural steroid injections                                  | Oral non-steroidal anti-inflammatory drugs                                            | Lumbar pain                               | Oswestry Low Back Pain Disability Questionnaire | Patient satisfaction                                     | Sport-active                        |                        |
| Cervin 2005 <sup>16</sup>           | Spine        | Analgesic                                 | Patients with painful osteoporotic vertebral compression fractures                                                                                   | Percutaneous vertebroplasty                                                            | 100 UI of calcitonin                                                                  | Pain: VAS score                           | Complications                                   | Treatment success                                        |                                     |                        |
| Chialva 2013 <sup>17</sup>          | Knee         | Drainage                                  | Patients undergoing primary arthroscopic ambulatory ACL reconstruction, using hamstrings autografts                                                  | Postoperative suction drains                                                           | No postoperative suction drains                                                       | Mobility range                            | Pain: VAS scores                                | Intraarticular swelling (hemarthrosis)                   | Patient satisfaction                |                        |
| De Agostino 2004 <sup>18</sup>      | Knee         | Anterior Cruciate Ligament Reconstruction | Patients with anterior cruciate ligament rupture of less than one year of evolution.                                                                 | Open reconstruction                                                                    | Arthroscopic surgery                                                                  | Patient satisfaction                      | Subjective and objective stability              | Return to sports                                         | Pain                                |                        |
| De Napoli 2016 <sup>19</sup>        | Knee/Hip     | Surgical Hemostasis                       | Patients undergoing primary hip and knee arthroplasties                                                                                              | Tranexamic acid                                                                        | Placebo                                                                               | Preoperative and postoperative hematocrit | Preoperative and postoperative hemoglobin       | Hospital stay                                            | Number of red cell unit transfusion | Complications          |
| Farfalli 2007 <sup>20</sup>         | Knee         | Drainage                                  | Patients undergoing arthroscopically assisted ACL reconstruction with hamstrings graft                                                               | Drain for 24 hours                                                                     | No drain                                                                              | Pain scores                               | Suprapatellar girth                             | Flexion                                                  | Extension                           |                        |
| Fernandez 2014 <sup>21</sup>        | Knee         | Analgesic                                 | Patients who underwent arthroscopic meniscectomy                                                                                                     | 10 ml of bupivacaine hydrochloride 0.5%                                                | 10 ml of bupivacaine hydrochloride 0.5% + triamcinolone acetonide (solution of 40 mg) | Pain: VAS score                           | Requirement of rescue analgesia                 |                                                          |                                     |                        |

| Author, year                  | Subspecialty | Topic                     | Population                                                                                                                                               | Intervention                                                                                     | Comparator                                                                                                                 | Outcome 1                                                   | Outcome 2                       | Outcome 3                                                      | Outcome 4                          | Outcome 5 <sup>a</sup> |
|-------------------------------|--------------|---------------------------|----------------------------------------------------------------------------------------------------------------------------------------------------------|--------------------------------------------------------------------------------------------------|----------------------------------------------------------------------------------------------------------------------------|-------------------------------------------------------------|---------------------------------|----------------------------------------------------------------|------------------------------------|------------------------|
| Gutierrez 2009 <sup>22</sup>  | Knee         | Analgesic                 | Patients with lateral hyperpressure syndrome (LHS) with patellofemoral chondromalacia (Outerbridge, grades I, II and III) that required knee arthroscopy | 0.5% bupivacaine (2 mg/kg), epinephrine (100 µg) and fentanyl (2.5 µg/kg)                        | 0.5% bupivacaine (2 mg/kg) and epinephrine (100 µg)                                                                        | Pain                                                        | Time of analgesia               | Postoperative range of motion at postoperative hours 6 and 24. |                                    |                        |
| Hernandez 2003 <sup>23</sup>  | Knee         | Arthroplasty, Replacement | Patients with degenerative joint disease grade III or IV according Ahlback classification                                                                | Wireless computer-assisted surgery (surgical navigation)                                         | Conventional system with manual instrumental alignment                                                                     | Femoral angle                                               | Tibial angle                    | Femoro-tibial angle                                            |                                    |                        |
| Holguin 2007 <sup>24</sup>    | hip          | Indirect traction         | Patients with proximal hip fracture undergoing surgery                                                                                                   | Preoperative skin traction                                                                       | No traction                                                                                                                | Pain: VAS scores                                            | Complications                   | MMSE scores                                                    | Pressure ulcers                    |                        |
| Juarez 2013 <sup>25</sup>     | Spine        | Ligamentoplasty           | Patients with degenerative lumbar spondylolisthesis who underwent circumferential arthrodesis                                                            | Dynamic stabilization system placed in the segment above                                         | No dynamic stabilization system placed in the segment above                                                                | Degeneration and disease of the segment above were assessed | Radiculopathy                   | SF-12                                                          | Pain: VAS scores                   |                        |
| Lopez 2002 <sup>26</sup>      | Hip          | Fracture Fixation         | Patients with pertrochanteric fractures managed surgically                                                                                               | Gamma nails                                                                                      | Sliding screws                                                                                                             | Postoperative transfusion                                   | Surgical time                   | Medical complications                                          | Re-interventions                   | Time to consolidations |
| Lopez 2015 <sup>27</sup>      | Hip          | Fracture Fixation         | Patients with pertrochanteric femoral fractures (AO classification 31-A1, 31-A2)                                                                         | Standard Gamma 3 nail + distal locking                                                           | Standard Gamma 3 nail + no distal locking                                                                                  | Medical complications                                       | Biomechanical complications     | Fracture collapse                                              | Transfusional requirement in units | Death rate             |
| Marquez 2015 <sup>28</sup>    | Hip          | Arthroscopy               | Patients with femoro-acetabular impingement                                                                                                              | Hip arthroscopy by outside-in technique                                                          | Hip arthroscopy by inside-out technique                                                                                    | Pain: VAS score                                             | Requirement of rescue analgesia | Operation time                                                 | WOMAC score                        |                        |
| Martinez 2015 <sup>29</sup>   | Elbow        | Regeneration procedures   | Patients with epicondylitis of the elbow                                                                                                                 | Single administration of platelet rich plasma                                                    | Single dose of 40 mg of methylprednisolone                                                                                 | Pain: VAS score                                             | Pain: Quick DASH scale          | Epicondylitis of the elbow                                     |                                    |                        |
| Martinez 2003 <sup>30</sup>   | Foot & ankle | Fracture Fixation         | Patients with Danis-Weber type B ankle fracture                                                                                                          | Posterior nonslipping plaque (PNP)                                                               | Lateral plaque (LP)                                                                                                        | Technical difficulties                                      | Operative time                  | Functional results                                             | Dehiscence                         | Infection              |
| Mas-Atance 2011 <sup>31</sup> | Hip          | Antiplatelet agents       | Patients over 65 years of age with low energy hip fracture                                                                                               | Plaque (PNP)                                                                                     | Patients on antiplatelet therapy undergoing delayed surgery, patients not on antiplatelet therapy undergoing early surgery | Bleeding                                                    | Transfusion requirements        | Mortality at 12 months                                         | Barthel index before hip fracture  | Number of transfusions |
| Mencia 2005 <sup>32</sup>     | Knee         | Surgical Hemostasis       | Patients who underwent total knee replacement                                                                                                            | Hemostasis was carried out with electrocautery once the tourniquet was deflated intraoperatively | Incision was closed and compressive dressing was applied before tourniquet removal                                         | Surgical Blood Loss                                         | Hemoglobin levels               | Hematocrit levels                                              | Transfusional requirement in units | Operative time         |
| Molano 2015 <sup>33</sup>     | Knee         | Education of patients     | Patients undergoing knee arthroscopy                                                                                                                     | Videos on a web page + conventional information                                                  | Conventional information                                                                                                   | Correct answers                                             | Incorrect answers               | Blank answers                                                  | Patient education                  |                        |

| Author, year                 | Subspecialty | Topic                                                | Population                                                                                                                                                         | Intervention                                                                                                                                                                     | Comparator                                                                       | Outcome 1                              | Outcome 2                      | Outcome 3            | Outcome 4                | Outcome 5 <sup>a</sup>                           |
|------------------------------|--------------|------------------------------------------------------|--------------------------------------------------------------------------------------------------------------------------------------------------------------------|----------------------------------------------------------------------------------------------------------------------------------------------------------------------------------|----------------------------------------------------------------------------------|----------------------------------------|--------------------------------|----------------------|--------------------------|--------------------------------------------------|
| Olivares_2004 <sup>34</sup>  | Trauma       | Nerve Block                                          | Patients with upper limb injuries                                                                                                                                  | Supraclavicular blocking                                                                                                                                                         | Interscalenic blocking                                                           | Sensitivity                            | Motor function                 | Extension            | Brachial plexus blocking |                                                  |
| Ortiz 2014 <sup>35</sup>     | Spine        | Spinal Fusion                                        | Patients undergoing instrumented lumbar arthrodesis (one level instrumented circumferential lumbar fusion )                                                        | Autologous bone graft                                                                                                                                                            | Fresh frozen bone allograft                                                      | Quality of life (ODI index)            | Operative time                 | Hospital stay        | Fusion rate              |                                                  |
| Palma 2015 <sup>36</sup>     | Shoulder     | Arthroscopy                                          | Patients with tears of up to 3 cm of the supraspinatus tendon, diagnosed by magnetic resonance imaging, with failure of up to three months conservative treatment. | Trans osseous-equivalent (TOE) with two anchors 5.5 mm PEEK, 3-wire, medial, and two knotless lateral anchors                                                                    | Classic single row technique with one or two anchors in 5.5 mm PEEK, with 3-wire | Shoulder Functionality: Constant score |                                |                      |                          |                                                  |
| Pereda 2006 <sup>37</sup>    | Trauma       | Fracture Fixation                                    | Patients with closed tibial diaphyseal fractures                                                                                                                   | HAP-200 Coraline hydroxyapatite + open reduction and internal osteosynthesis                                                                                                     | Open reduction and internal osteosynthesis                                       | Consolidation time                     | Osseo integration              | complications        |                          |                                                  |
| Perez 2011 <sup>38</sup>     | Knee         | Viscosupplementation                                 | patients with gonarthrosis grade I, II, III                                                                                                                        | Five 2.5 ml doses of hyaluronic acid, at one dose per week                                                                                                                       | Single 2 ml dose of intraarticular methylprednisolone                            | WOMAC functional scale                 | Pain: VAS scores               |                      |                          |                                                  |
| Pescador 2011 <sup>39</sup>  | Knee         | Arthroplasty, Minimally Invasive Surgical Procedures | Patients undergoing total knee arthroplasty                                                                                                                        | Minimally invasive surgery                                                                                                                                                       | Classical approach                                                               | Operative time                         | Hospital stay                  | Surgical blood loss  | Auto-transfusion         | Pain: VAS scores at postoperative, 4 and 8 years |
| Pesciallo 2009 <sup>40</sup> | Knee         | Analgesic                                            | Patients undergoing total knee arthroplasty                                                                                                                        | Intraoperative infiltration of periarticular soft tissues( 20 ml ropivacaine of 7.5 mg / ml diluted in 20 ml of physiological solution + 0.1 µg of clonidine + 4 mg of morphine) | No infiltration                                                                  | Pain score                             | Rescue opioids                 |                      |                          |                                                  |
| Pesciallo 2015 <sup>41</sup> | Knee         | Nerve Block                                          | Patients undergoing total knee arthroplasty                                                                                                                        | Intraoperative infiltration of periarticular soft tissues( 20 ml ropivacaine of 7.5 mg / ml diluted in 20 ml of physiological solution + 0.1 µg of clonidine + 4 mg of morphine) | Femoral and sciatic nerve block before surgery                                   | Postoperative pain score               | Rescue opioids                 | Complications        |                          |                                                  |
| Prieto 2009 <sup>42</sup>    | Knee         | Nerve Block                                          | Patients undergoing total knee arthroplasty                                                                                                                        | Bupivacaine 0.25% (30 ml)                                                                                                                                                        | Bupivacaine 0.25% (15 ml)+mepivacaine 2% (15 ml)                                 | Pain score                             | Patient satisfaction           | Analgesia onset time | Analgesia duration       | Complications                                    |
| Restrepo 2007 <sup>43</sup>  | Hip          | Arthroplasty, Replacement                            | Patients undergoing total hip arthroplasty                                                                                                                         | Minimal invasive hip arthroplasty + drains                                                                                                                                       | Minimal invasive hip arthroplasty                                                | Inflammation                           | Postoperative hematocrit level | Pain                 | Bleeding                 | Transfusional requirement                        |
| Rojas 2005 <sup>44</sup>     | Shoulder     | Anesthesia and Analgesia                             | Patients undergoing reduction of the shoulder dislocation                                                                                                          | 10 milliliters of 2% Lidocaine intraarticular                                                                                                                                    | IV Propofol at the rate of 1 mg/kg                                               | Pain: VAS score                        | Hospital stay                  |                      |                          |                                                  |

| Author, year                 | Subspecialty | Topic                    | Population                                                                                 | Intervention                                                                                                                                                                                                                                                                                                                                                                                               | Comparator                                                                                                                                                                                                                                                                                                               | Outcome 1                                                                                  | Outcome 2                                       | Outcome 3                                  | Outcome 4                           | Outcome 5 <sup>a</sup> |
|------------------------------|--------------|--------------------------|--------------------------------------------------------------------------------------------|------------------------------------------------------------------------------------------------------------------------------------------------------------------------------------------------------------------------------------------------------------------------------------------------------------------------------------------------------------------------------------------------------------|--------------------------------------------------------------------------------------------------------------------------------------------------------------------------------------------------------------------------------------------------------------------------------------------------------------------------|--------------------------------------------------------------------------------------------|-------------------------------------------------|--------------------------------------------|-------------------------------------|------------------------|
| Salles 2012 <sup>45</sup>    | Hand         | Tenotomy                 | Patients diagnosed with carpal tunnel syndrome                                             | Transverse incision of 1 cm proximal to carpal transverse ligament                                                                                                                                                                                                                                                                                                                                         | Two incisions, one transverse proximal to carpal transverse ligament and the other distal                                                                                                                                                                                                                                | Pain: VAS score                                                                            | Major complications                             | Patient satisfaction                       | Incorporation of daily activities   |                        |
| Sánchez 2000 <sup>46</sup>   | Trauma       | Fracture Fixation        | Adult patients with distal radius fractures types A3 and C2 according to AO classification | Closed reduction, stabilization with Norian SRS, and cast immobilization for 2 weeks                                                                                                                                                                                                                                                                                                                       | Closed reduction with cast immobilization for 6 weeks                                                                                                                                                                                                                                                                    | Presence, location and intensity of pain in the fractured wrist at 6 weeks, 3 and 6 months | Recovery of function at 6 weeks, 3 and 6 months | Hand strength                              | Ability to perform daily activities | Radiographic results   |
| Sangüesa 2006 <sup>47</sup>  | Knee         | Surgical Hemostasis      | Patients who underwent total knee replacement                                              | Group C, after prosthesis placement the tourniquet was removed hemostasis was applied and open drainages without vacuum were left in place for 24 hours, and then with vacuum for a further 24 hours<br>Group D, the tourniquet was kept in place until compressive bandaging was completed and open drainages without vacuum were left in place for 24 hours, and then with vacuum for a further 24 hours | Group A, the incision was closed without withdrawing the tourniquet and, after compressive bandaging open drainages with vacuum were left in place for 48 hours<br>Group B, after prosthesis placement the tourniquet was removed, hemostasis was applied and open drainages with vacuum were left in place for 48 hours | Surgical /Postoperative Blood Loss                                                         | Hemoglobin levels                               | Hematocrit levels                          |                                     |                        |
| Sebastian 2012 <sup>48</sup> | Trauma       | Fracture Fixation        | Patients with distal radius fractures type III- VIII according to Fryckman classification  | Volar plate                                                                                                                                                                                                                                                                                                                                                                                                | External fixator                                                                                                                                                                                                                                                                                                         | McDermid Test                                                                              | Pain: VAS score                                 | Disability                                 | Functionality                       | Complications          |
| Sebastian 2001 <sup>49</sup> | Spine        | Transfusion              | Patients who underwent instrumented lumbar spinal fusion                                   | Group B (postoperative autologous blood salvage PBSR ); Group C (preoperative autologous blood donation PABD); Group D (preoperative autologous blood donation + postoperative autologous blood salvage PABD + PBSR)                                                                                                                                                                                       | Group A (Control, homologous blood alone)                                                                                                                                                                                                                                                                                | Reducing exposure to homologous blood transfusions (HBT)                                   | Transfusion-related complications               |                                            |                                     |                        |
| Trueba 2003 <sup>50</sup>    | Shoulder     | Anesthesia and Analgesia | Patients undergoing reduction for acute anterior glenohumeral dislocation                  | Intraarticular injection of 20 ml of 1% lidocaine                                                                                                                                                                                                                                                                                                                                                          | Intravenous injection of propofol 1mg/kg                                                                                                                                                                                                                                                                                 | Pain: VAS score                                                                            | Time or reduction maneuver                      | Avoidance of homologous blood transfusions | Complications                       | Stay length in ER      |
| Utrilla 1998 <sup>51</sup>   | Trauma       | Fracture Fixation        | Elderly patients with trochanteric fracture of the femur                                   | Compression screw-on sliding plate                                                                                                                                                                                                                                                                                                                                                                         | RAB nail-plate (monoblock with a reinforced 120° angle)                                                                                                                                                                                                                                                                  | Successful reduction                                                                       | Radiological reduction                          | Complications                              | Reoperation                         |                        |
| Valles 2011 <sup>52</sup>    | Knee         | Arthroscopy              | Patients undergoing knee arthroscopy surgery, grade I the Outerbridge classification       | RV023 (Hyalgan GF20 +6-MPA + bupivacaine +oxitetracycline +glicine)                                                                                                                                                                                                                                                                                                                                        | Hyalgan GF20                                                                                                                                                                                                                                                                                                             | Articular function                                                                         | Articular function recovery                     | Complications                              |                                     |                        |

| Author, year                   | Subspecialty | Topic                            | Population                                                                       | Intervention                                                            | Comparator                                                         | Outcome 1           | Outcome 2          | Outcome 3                    | Outcome 4                   | Outcome 5 <sup>a</sup> |
|--------------------------------|--------------|----------------------------------|----------------------------------------------------------------------------------|-------------------------------------------------------------------------|--------------------------------------------------------------------|---------------------|--------------------|------------------------------|-----------------------------|------------------------|
| Varela 2010 <sup>53</sup>      | Hip          | Arthroplasty, Replacement        | Patients with primary or secondary coxarthrosis to aseptic femoral head necrosis | Minimally invasive direct lateral approach                              | Conventional direct lateral approach                               | Surgical blood loss | Postoperative pain | Time to recovery             | Operative time              | Component adjustment   |
| Vargas-Mena 2012 <sup>54</sup> | Infection    | Antibiotic                       | Patients undergoing elective orthopedic surgery due to acute or chronic disease  | Cephalothin for 24 hours and placebo for ten days                       | Cephalothin for 24 hours plus ten additional days of dicloxacillin | Operative time      | Hospital stay      | Adverse events               | Surgical time               |                        |
| Vega 2002 <sup>55</sup>        | Knee         | Arthroscopic Surgical Procedures | Adult patients who had grade II-III bilateral patellar chondromalacia            | High frequency                                                          | Debridement of the patella and scissor lateral retinaculum release | Pain score          | Gait               | Transoperative complications | Postoperative complications | Inflammation           |
| Vicent 2007 <sup>56</sup>      | Knee         | Analgesic                        | Patients undergoing knee arthroscopy                                             | A.-1 mg morphine chloride<br>B.-4 mg morphine chloride                  | Placebo: saline solution                                           | Pain control: VAS   | Rescue analgesia   | Side effects                 |                             |                        |
| Vidal 2000 <sup>57</sup>       | Knee         | Anesthesia and Analgesia         | Patients undergoing knee arthroscopy                                             | Bupivacaine 0.5% and epinephrine 1:200,000 and 100 mg fentanyl at 30 ml | Bupivacaine 0.5% and epinephrine 1:200,000 at 30 ml                | Postoperative pain  | Operative time     | Post-surgical bleeding       | Complications               |                        |

<sup>a</sup>. Up to five outcomes per study were included in the table.

## REFERENCES

1. Almaraz JA, Rojas- Mejia JG, Jimenez-Sandoval TP, Sarmiento Hernandez AP, Murillo Najera FJ. Efecto de la inmunoestimulación en el paciente traumatizado. *Acta Ortopédica Mexicana*. 2002;16(5):253-257.
2. Amenabar T, Jorge D, Charnay P, Begazo H, Botello J. Acido tranexámico para disminuir sangrado y necesidad de transfusión en artroplastia total de cadera: ¿importa el esquema de administración? Estudio prospectivo, aleatorizado, doble ciego. *Revista Chilena de Ortopedia y Traumatología*. 2015;56(1):7-15.
3. Anse de Alonso JC, Contreras Joya M, S PH. Estudio prospectivo y aleatorizado en pacientes con lumbalgias o lumbociatálgias tratados con ozonoterapia. *Aparato Locomotor*. 2007;5(1):46-54.
4. Arismendi Montoya A, Jaramillo Fernandez JC, Fernandez Lopera F, Vallejo Diaz A, Arango Mejia AA. Luxación acromioclavicular aguda: placa gancho vs. suturas coracoclaviculares. *Revista Colombiana de Ortopedia y Traumatología*. 2011;25(4):337-344.

5. Arteaga-Solis JR, Negrete-Corona J, Chavez-Hinojosa E, Diaz-Martinez B. Efectividad de dos medicamentos intrarticulares en pacientes con artrosis de rodilla: colágeno polimerizado versus hylano gf 20. *Acta Ortopédica Mexicana*. 2014;28(3):164-167.
6. Aviña-Valencia JA, Guillén-Alcala MA. Reparación de la ruptura aguda del tendón calcáneo: Estudio comparativo entre dos técnicas quirúrgicas. *Acta Ortopédica Mexicana*. 2009;23(3):125-129.
7. Bidolegui FM, Pereira SM, Lugones A, Vindver GI. Ácido tranexámico endovenoso en el reemplazo total de rodilla sin manguito hemostático: estudio prospectivo aleatorizado. *Revista de la Asociación Argentina de Ortopedia y Traumatología*. 2014;79(3):1-9.
8. Borreto JG. Miniincisión o cirugía abierta en el tratamiento del síndrome del túnel carpiano idiopático. *Revista de la Asociación Argentina de Ortopedia y Traumatología*. 2006;71:225-231.
9. Bosch MD, Viladot Perice A, Suso Vergara A. Estudio evolutivo del pie plano infantil. *Revista de Ortopedia y Traumatología*. 1999;43(3):1-16.
10. Calderón A, Ramos T, Vilchez F, et al. Comparación del clavo intramedular femoral proximal (PFN) versus placa DHS para el tratamiento de fracturas intertrocantericas. Análisis prospectivo. *Acta Ortopédica Mexicana*. 2013;27(4):236-239.
11. Calvo R, Figueroa D, Arellano S, Schmidt-Hebbel A, Ramos M, Riquelme A. Bloqueo del nervio femoral único vs. continuo en reconstrucción del ligamento cruzado anterior: un estudio clínico aleatorizado. *Revista Chilena de Ortopedia y Traumatología*. 2016;57(1):14-19.
12. Carriedo Rico EG, Torres Roldán F, Abrego Ayala CE, Vega Herrera R, Valdes ML. Prótesis total de la rodilla, estabilizada o no estabilizada: estudio comparativo. *Revista Mexicana de Ortopedia y Traumatología (Actualmente Acta Ortopédica Mexicana)*. 2002;16(2):46-50.
13. Castro-Menendez M, Pena-Paz S, Rocha -García F, Rodríguez- Casas N, Huici-Izco R, Montero-Vieites A. Eficacia de 2 gramos intravenosos de ácido tranexámico en la reducción del sangrado postoperatorio de la artroplastia total de cadera y rodilla. *Revista Española de Cirugía Ortopédica y Traumatología*. 2016;60(5):315-324.
14. Castro-Menéndez M, Pagazaurtundúa-Gómez S, Pena-Paz S, Huici-Izco R, Rodríguez-Casas N, Montero-Viéites A. Elongación en Z del ligamentum carpi transversum vs. apertura completa para el tratamiento del síndrome del túnel del carpo. *Revista Española de Cirugía Ortopédica y Traumatología*. 2016;60(6):355-365.
15. Cervera-Irímia J, Tomé-Bermejo F. Infiltración esteroidea epidural por vía caudal en el tratamiento del dolor lumbar crónico de origen discal. Estudio comparativo, prospectivo y aleatorizado. *Revista Española de Cirugía Ortopédica y Traumatología*. 2013;57(5):324-332.



16. Cervin Serrano S, Irineo Cabrales AB, Flores Flores P, Osuna Ramirez I. Vertebroplastía: Tratamiento del dolor por fractura vertebral compresiva osteoporótica. *Acta Ortopédica Mexicana*. 2005;19(4):143-151.
17. Chialva J, Torres A, Quiroga H, Rodriguez E, Ruggieri E, M V. Utilización de Drenaje Postoperatorio en Cirugía Artroscópica Ambulatoria del Ligamento Cruzado Anterior: un Estudio Prospectivo Randomizado. *Artroscopia*. 2013;20(3):77-81.
18. De Agostino H. Sustitución del ligamento cruzado anterior por un autoinjerto del tercio medio del tendón rotuliano. Cirugías a cielo abierto y artroscópica. *Revista de la Asociación Argentina de Ortopedia y Traumatología*. 2004;69:133-138.
19. De Napoli G, Ottolenghi J, Melo L. Comparación de sangrado y transfusiones en artroplastias primarias de cadera y rodilla con monodosis de ácido tranexámico frente a placebo en un hospital universitario. Estudio prospectivo. *Revista Colombiana de Ortopedia y Traumatología*. 2016;30(3):101-106.
20. Farfalli G, Bongiovanni S, Narvaez R, et al. Utilización de drenajes luego de la reconstrucción artroscópica del LCA con injerto cuádruple de isquiotibiales. *Revista de la Asociación Argentina de Ortopedia y Traumatología*. 2007;72(4):359-365.
21. Fernandez Diaz J, Garcia-Miguel S, Alvarez Castro A, Alonso Recio A, Suarez Huerta ML. Comparación analgésica postquirúrgica de la infiltración corticoanestésica y la anestésica pura tras meniscectomía artroscópica de rodilla. *Trauma Fund MAPFRE*. 2014;25(3):157-160.
22. Gutierrez- Mendoza I, Perez-Correa J, Serna-Vela F, et al. Efecto analgésico del fentanyl intraarticular en artroscopía de rodilla para el síndrome de hiperpresión lateral patelofemoral. *Acta Ortopédica Mexicana*. 2009;23(6):336-341.
23. Hernandez-Vaquero D, Suarez A, Perez-Hernandez P, Garcia-Sandoval A, Barrera JL. Cirugía asistida con ordenador en las artroplastias de rodilla. Estudio prospectivo. *Revista de Ortopedia y Traumatología*. 2003;47:328-335.
24. Holguin Maldonado E, Rojas Polania C, Mateus Lugo R. Uso de tracción cutánea prequirúrgica en pacientes con fractura de fémur proximal en el Hospital Simón Bolívar de Bogotá. *Revista Colombiana de Ortopedia y Traumatología*. 2007;21(2):119-122.
25. Juarez-Jimenez HG, Zarate-Kalfopulos B, Alpizar-Aguirre A, Sanchez- Bringas MG, Rosales-Olivares LM, Reyes-Sanchez AA. Utilidad de la ligamentoplastía para la prevención de la artrodesis en espondilolistesis lumbar degenerativa. Reporte preliminar. *Acta Ortopédica Mexicana*. 2013;27(5):324-330.
26. Lopez MF, Pelfort Lopez X, Garcia Casas A, Ramirez Valencia M, Leon Garcia V, Ballester J. Estudio prospectivo aleatorio comparativo del tornillo deslizante y el clavo gamma en el tratamiento de las fracturas pertrocantéreas. *Revista de Ortopedia y Traumatología*. 2002;46(6):505-509.
27. Lopez-Vega M, Gil-Monzo E, Rodrigo-Perez J, et al. Estudio prospectivo aleatorizado sobre la influencia del bloqueo distal del clavo Gamma 3 en el tratamiento de las fracturas pertrocantéreas de fémur. *Revista Española de Cirugía Ortopédica y Traumatología*. 2015;59(1):26-35.

28. Marquez Arabia J, Marquez Arabia W, Gomez Hoyos J, Gallo Villegas J. Dolor posoperatorio en pacientes sometidos a artroscopia de cadera con la técnica dentro-fuera en comparación con la técnica fuera-dentro. *Revista Cubana de Ortopedia y Traumatología*. 2015;28(2):94-104.
29. Martinez-Montiel O, Valencia-Martinez G, Blanco-Bucio P, Villalobos-Campuzano C. Tratamiento de epicondilitis de codo con plasma rico en plaquetas versus corticosteroide local. *Acta Ortopédica Mexicana*. 2015;29(3):155-158.
30. Martinez-Velez M, Saldiva Moreno A, Sierra Martinez O, Jimenez Gutierrez E. Placa posterior antideslizante vs placa lateral en el tratamiento de las fracturas de tobillo tipo B de Weber. *Acta Ortopédica Mexicana*. 2003;17(6):259-264.
31. Mas-Atance J, Marzo-Alonso C, Matute-Crespo M, et al. Estudio comparativo aleatorizado de la intervención quirúrgica temprana frente a la demorada en los pacientes con fractura de cadera tratados con antiagregantes plaquetarios. Determinación de la agregabilidad plaquetaria y el sangrado perioperatorio y la revisión de la mortalidad al año. *Revista Española de Cirugía Ortopédica y Traumatología*. 2013;57(4):240.
32. Mencia- Barrio M, Sanchez-Herreraes S, Alonso-Barrio A, Sanchez-Lazaro J, Betegon-Nicolas J. Eficacia de la hemostasia tras retirada del torniquete en la artroplastia de rodilla. *Revista de Ortopedia y Traumatología*. 2005;49:341-345.
33. Molano-Bernardino A, Maestro Fernandez A, Seijas Vasquez R, Cintado Aviles M, Edelaar P, Perez Carro L. Eficacia de Internet audiovisual para educación de pacientes con artroscopia de rodilla. *Revista Española de Artroscopia y Cirugía Articular*. 2015;22(2):85-92.
34. Olivares Santos W, Jacobo Garcia R. Eficacia en el bloqueo del plexo braquial en cirugía del miembro torácico entre la vía supraclavicular y la interescalénica. *Trauma*. 2004;7(3):79-84.
35. Ortiz P, Flores Canter P. Injerto autólogo versus aloinjerto fresco congelado en cirugía lumbar instrumentada. Resultados clínicos y radiológicos. *Revista de la Asociación Argentina de Ortopedia y Traumatología*. 2014;79(1):1-9.
36. Palma Carpitiero E, Barros A, Zurbano X, Goncalves S, Constantino H, Pires L. Tratamiento mediante hilera única versus transóseo doble hilera en las roturas del manguito de los rotadores de tamaño pequeño y medio. Estudio prospectivo y aleatorizado. *Revista Española de Artroscopia y Cirugía Articular*. 2015;22(3):126-133.
37. Pereda Cardoso O, Rumbaut Reyes M. Tratamiento de fracturas diafisarias cerradas de tibia con osteosíntesis interna e implantes de hidroxiapatita Coralina® HAP-200. *Revista Cubana de Ortopedia y Traumatología*. 2006;20(1):1-9.
38. Perez-Serna A, Negrete-Corona J, Chavez-Hinojosa E, Lopez Mariscal C. Efectividad del hialuronato de sodio en pacientes con gonartrosis, estudio comparativo y aleatorizado. *Acta Ortopédica Mexicana*. 2011;25(4):208-215.

39. Pescador D, Moreno AA, Blanco J, Garcia I. Análisis a largo plazo de la cirugía mínimamente invasiva en la artroplastia de rodilla. *Acta Ortopédica Mexicana*. 2011;25(6):353-358.
40. Pesciallo C, Mana PASTRIAN D, Lopreite F, Astudillo F, del Sel H. Infiltración intraoperatoria para el manejo del dolor en la artroplastia total de rodilla. *Revista de la Asociación Argentina de Ortopedia y Traumatología*. 2009;74(1):1-9.
41. Pesciallo C, Mana PASTRIAN D, Garabano G, Lopreite F, del sel H. Estudio comparativo para el manejo del dolor en el reemplazo total de rodilla: infiltración tisular intraoperatoria versus bloqueo de nervios periféricos. *Revista de la Asociación Argentina de Ortopedia y Traumatología*. 2015;80(1):12-19.
42. Prieto-Requeijo P, Mayo-Moldes M, Corujeira-Rivera M, Vilanova-Vasquez V. Bloqueo del nervio femoral en postoperatorio de artroplastia total de rodilla: comparación de bupivacaína 0,25% con mezcla de bupivacaína 0,25% y mepivacaína 2%. *Revista Española de Cirugía Ortopédica y Traumatología*. 2009;53(5):300-304.
43. Restrepo-Giraldo M. Mini-incisión en artroplastia total de cadera con vs. sin exovac: estudio experimental controlado, aleatorizado doble ciego. *Revista Colombiana de Ortopedia y Traumatología*. 2007;21(2):83-93.
44. Rojas Samano I, Bello Gonzalez A, Vives Aceves H, Rojas Duran J, R MM. Reducción de la luxación traumática anterior de hombro mediante uso de anestesia intraarticular con lidocaína vs anestesia intravenosa. *Acta Ortopédica Mexicana*. 2005;19(5):207-209.
45. Salles Betancourt G, Cabrera Viltres N, Alvarez Placeres L, Marrero Riveron L, Figueredo Diaz L, Salles Prendes R. Miniabordaje en la cirugía del túnel carpiano. *Revista Cubana de Ortopedia y Traumatología*. 2012;26(1):28-39.
46. Sanchez-Sotelo J, Munuera L, Madero R, L C. Tratamiento de las fracturas de la extremidad distal del radio con un cemento oseo remodelable. *Revista de Ortopedia y Traumatología*. 2000;44(4):370-383.
47. Sanguesa Nebot M, Cabanes Soriano F, Villanueva Garcia E, Fernandez Sabate E. Estudio comparativo de las pérdidas sanguíneas en cirugía protésica primaria de rodilla con diferentes pautas de drenaje y momentos de retirar la isquemia. *Revista de Ortopedia y Traumatología*. 2006;50:437-440.
48. Sebastian-Castañon S, Fontaine-Guevara G, Negrete-Corona J, Arteaga-Solis JR. Fracturas complejas de radio distal en pacientes jóvenes. Comparación entre fijador externo y placa volar. *Acta Ortopédica Mexicana*. 2012;26(5):298-302.
49. Sebastian C, Romero R, Olalla E, Garcia-Vallejo J, Gutierrez J, Muñoz M. Autotransfusión en cirugía de columna lumbar. *Revista de Ortopedia y Traumatología*. 2001;45(6):502-511.

50. Trueba-Dalavillo C, Pozzo Bobarin A, Gil Orbezo F. Xilocaína intra-articular vs sedación intravenosa como método analgésico para la reducción de la luxación anterior de hombro. *Acta Ortopédica Mexicana*. 2003;17(5):225-228.
51. Utrilla AL, Cebrian Gomez R, Forcada E. Tornillo-placa a compresión o clavo-placa monobloque en las fracturas trocantéreas del fémur del anciano. *Revista de Ortopedia y Traumatología*. 1998;42:368-373.
52. Valles-Figueroa J, Ambrosio-Salgado J, Suarez-Ahedo C, Rueda-Villaron O. Comparación del uso intraarticular postoperatorio de RV023 y hialuronato G-F20 en artroscopía de rodilla. Experiencia en el Hospital Español de México. *Acta Ortopédica Mexicana*. 2011;25(2):119-125.
53. Varela-Egocheaga J, Suarez-Suarez M, Fernandez-Villan M, Gonzalez- Sastre V, Varela-Gomez J, A M-M. Abordaje lateral mínimamente invasivo en artroplastia total de cadera. Estudio prospectivo y aleatorizado. *Revista Española de Cirugía Ortopédica y Traumatología*. 2010;54(1):27-33.
54. Vargas-Mena R, Arrerondo-Gomez E, Pavia-Carrillo E. Efecto de un esquema corto de profilaxis antimicrobiana sobre la prevalencia de infecciones postoperatorias en cirugía electiva de traumatología y ortopedia. *Acta Ortopédica Mexicana*. 2012;26(6):369-374.
55. Vega Herrera R, Carriedo Rico EG, Torres Roldán F, Valdes ML, Vega Zapata R, Terroba Larios V. Rasurado vs radiofrecuencia. Tratamiento comparativo de la condromalacia patelofemoral bilateral grado II-III por artroscopía. *Acta Ortopédica Mexicana*. 2002;16(4):193-197.
56. Vicent-Vera J, Palomo J, Diaz-Almodovar J. Morfina intraarticular tras artroscopia de rodilla. Estudio prospectivo, aleatorizado y doble ciego. *Revista de Ortopedia y Traumatología*. 2007;51:188-193.
57. Vidal-Rodriguez F, Anguiano-Garcia M. Anestesia intra-articular en la artroscopía de la rodilla. Estudio experimental comparativo doble ciego. *Revista Mexicana de Ortopedia y Traumatología (Actualmente Acta Ortopédica Mexicana)*. 2000;14(2):196-199.

**Supplemental file 3.** Risk of bias assessment for each included CCT

**Almaraz 2002**

| <b>Bias</b>                                               | <b>Authors' judgement</b> | <b>Support for judgement</b>                                                                                                         |
|-----------------------------------------------------------|---------------------------|--------------------------------------------------------------------------------------------------------------------------------------|
| Random sequence generation (selection bias)               | Unclear risk              | No description of the methods used to allocate participants to treatment group was given                                             |
| Allocation concealment (selection bias)                   | Unclear risk              | Insufficient information to judge this item as low or high risk of bias                                                              |
| Blinding of participants and personnel (performance bias) | Low risk                  | Blinding of participants and key study personnel ensured, and unlikely that the blinding could have been broken (double blind study) |
| Blinding of outcome assessment (detection bias)           | Unclear risk              | Insufficient information to judge this item as low or high risk of bias                                                              |
| Incomplete outcome data (attrition bias)                  | Unclear risk              | Insufficient information to judge this item as low or high risk of bias                                                              |
| Selective reporting (reporting bias)                      | Unclear risk              | Insufficient information to permit judgement of 'Low risk' or 'High risk                                                             |
| Other bias                                                | Low risk                  | The study appears to be free of other sources of bias                                                                                |

**Alonso 2007**

| <b>Bias</b>                                               | <b>Authors' judgement</b> | <b>Support for judgement</b>                                                             |
|-----------------------------------------------------------|---------------------------|------------------------------------------------------------------------------------------|
| Random sequence generation (selection bias)               | Unclear risk              | No description of the methods used to allocate participants to treatment group was given |
| Allocation concealment (selection bias)                   | Unclear risk              | Insufficient information to judge this item as low or high risk of bias                  |
| Blinding of participants and personnel (performance bias) | Unclear risk              | Insufficient information to judge this item as low or high risk of bias                  |
| Blinding of outcome assessment (detection bias)           | Unclear risk              | Insufficient information to judge this item as low or high risk of bias                  |
| Incomplete outcome data (attrition bias)                  | Low risk                  | No missing outcome data                                                                  |
| Selective reporting (reporting bias)                      | Unclear risk              | Insufficient information to permit judgement of 'Low risk' or 'High risk                 |
| Other bias                                                | Low risk                  | The study appears to be free of other sources of bias                                    |

**Amenabar 2015**

| Bias                                                      | Authors' judgement | Support for judgement                                                                                                                                                                 |
|-----------------------------------------------------------|--------------------|---------------------------------------------------------------------------------------------------------------------------------------------------------------------------------------|
| Random sequence generation (selection bias)               | Low risk           | The investigators describe a random component in the sequence generation process (computer random number generator)                                                                   |
| Allocation concealment (selection bias)                   | Unclear risk       | Insufficient information to judge this item as low or high risk of bias                                                                                                               |
| Blinding of participants and personnel (performance bias) | Low risk           | Blinding of participants and key study personnel ensured, and unlikely that the blinding could have been broken (Surgeon, patients and surgical team were blinded to assigned group.) |
| Blinding of outcome assessment (detection bias)           | Low risk           | Blinding of outcome assessment ensured, and unlikely that the blinding could have been broken.(external assessment)                                                                   |
| Incomplete outcome data (attrition bias)                  | Low risk           | No missing outcome data                                                                                                                                                               |
| Selective reporting (reporting bias)                      | Unclear risk       | Insufficient information to permit judgement of 'Low risk' or 'High risk'                                                                                                             |
| Other bias                                                | Low risk           | The study appears to be free of other sources of bias                                                                                                                                 |

**Arismendi 2011**

| Bias                                                      | Authors' judgement | Support for judgement                                                                                                                                                                 |
|-----------------------------------------------------------|--------------------|---------------------------------------------------------------------------------------------------------------------------------------------------------------------------------------|
| Random sequence generation (selection bias)               | Low risk           | The investigators describe a random component in the sequence generation process (computer random number generator)                                                                   |
| Allocation concealment (selection bias)                   | Low risk           | Participants and investigators enrolling participants could not foresee assignment (Central allocation-telephone controlled randomization-);                                          |
| Blinding of participants and personnel (performance bias) | Low risk           | Blinding of participants and key study personnel ensured, and unlikely that the blinding could have been broken (Surgeon, patients and surgical team were blinded to assigned group.) |
| Blinding of outcome assessment (detection bias)           | Unclear risk       | Insufficient information to judge this item as low or high risk of bias                                                                                                               |
| Incomplete outcome data (attrition bias)                  | Low risk           | No missing outcome data                                                                                                                                                               |
| Selective reporting (reporting bias)                      | Unclear risk       | Insufficient information to permit judgement of 'Low risk' or 'High risk                                                                                                              |
| Other bias                                                | Low risk           | The study appears to be free of other sources of bias                                                                                                                                 |

**Arteaga 2015**

| Bias                                                      | Authors' judgement | Support for judgement                                                                                                                              |
|-----------------------------------------------------------|--------------------|----------------------------------------------------------------------------------------------------------------------------------------------------|
| Random sequence generation (selection bias)               | High risk          | The investigators describe a non-random component in the sequence generation process. (Patients were divided into two groups: even or odd numbers) |
| Allocation concealment (selection bias)                   | Unclear risk       | Insufficient information to judge this item as low or high risk of bias                                                                            |
| Blinding of participants and personnel (performance bias) | High risk          | No blinding or incomplete blinding, and the outcome is likely to be influenced by lack of blinding;                                                |
| Blinding of outcome assessment (detection bias)           | Unclear risk       | Insufficient information to judge this item as low or high risk of bias                                                                            |
| Incomplete outcome data (attrition bias)                  | Unclear risk       | Insufficient information to judge this item as low or high risk of bias                                                                            |
| Selective reporting (reporting bias)                      | Unclear risk       | Insufficient information to permit judgement of 'Low risk' or 'High risk                                                                           |
| Other bias                                                | Low risk           | The study appears to be free of other sources of bias                                                                                              |

**Aviña 2009**

| <b>Bias</b>                                               | <b>Authors' judgement</b> | <b>Support for judgement</b>                                                             |
|-----------------------------------------------------------|---------------------------|------------------------------------------------------------------------------------------|
| Random sequence generation (selection bias)               | Unclear risk              | No description of the methods used to allocate participants to treatment group was given |
| Allocation concealment (selection bias)                   | Unclear risk              | Insufficient information to judge this item as low or high risk of bias                  |
| Blinding of participants and personnel (performance bias) | Unclear risk              | Insufficient information to judge this item as low or high risk of bias-                 |
| Blinding of outcome assessment (detection bias)           | Unclear risk              | Insufficient information to judge this item as low or high risk of bias                  |
| Incomplete outcome data (attrition bias)                  | Unclear risk              | Insufficient information to judge this item as low or high risk of bias                  |
| Selective reporting (reporting bias)                      | Unclear risk              | Insufficient information to permit judgement of 'Low risk' or 'High risk                 |
| Other bias                                                | Low risk                  | The study appears to be free of other sources of bias                                    |

**Bidolegui 2014**

| <b>Bias</b>                                               | <b>Authors' judgement</b> | <b>Support for judgement</b>                                                                                                                    |
|-----------------------------------------------------------|---------------------------|-------------------------------------------------------------------------------------------------------------------------------------------------|
| Random sequence generation (selection bias)               | Unclear risk              | No description of the methods used to allocate participants to treatment group was given                                                        |
| Allocation concealment (selection bias)                   | Unclear risk              | Insufficient information to judge this item as low or high risk of bias                                                                         |
| Blinding of participants and personnel (performance bias) | Unclear risk              | Insufficient information to judge this item as low or high risk of bias                                                                         |
| Blinding of outcome assessment (detection bias)           | Low risk                  | No blinding of outcome assessment, but the review authors judge that the outcome measurement is not likely to be influenced by lack of blinding |
| Incomplete outcome data (attrition bias)                  | Low risk                  | No missing outcome data                                                                                                                         |
| Selective reporting (reporting bias)                      | Unclear risk              | Insufficient information to permit judgement of 'Low risk' or 'High risk                                                                        |
| Other bias                                                | Low risk                  | The study appears to be free of other sources of bias                                                                                           |



**Boretto 2016**

| <b>Bias</b>                                               | <b>Authors' judgement</b> | <b>Support for judgement</b>                                                             |
|-----------------------------------------------------------|---------------------------|------------------------------------------------------------------------------------------|
| Random sequence generation (selection bias)               | Unclear risk              | No description of the methods used to allocate participants to treatment group was given |
| Allocation concealment (selection bias)                   | Unclear risk              | Insufficient information to judge this item as low or high risk of bias                  |
| Blinding of participants and personnel (performance bias) | Unclear risk              | Insufficient information to judge this item as low or high risk of bias                  |
| Blinding of outcome assessment (detection bias)           | Unclear risk              | Insufficient information to judge this item as low or high risk of bias                  |
| Incomplete outcome data (attrition bias)                  | Low risk                  | No missing outcome data                                                                  |
| Selective reporting (reporting bias)                      | Unclear risk              | Insufficient information to permit judgement of 'Low risk' or 'High risk                 |
| Other bias                                                | Low risk                  | The study appears to be free of other sources of bias                                    |

**Bosh 1999**

| <b>Bias</b>                                               | <b>Authors' judgement</b> | <b>Support for judgement</b>                                                                                                                                              |
|-----------------------------------------------------------|---------------------------|---------------------------------------------------------------------------------------------------------------------------------------------------------------------------|
| Random sequence generation (selection bias)               | Unclear risk              | No description of the methods used to allocate participants to treatment group was given The investigators describe a random component in the sequence generation process |
| Allocation concealment (selection bias)                   | Unclear risk              | Insufficient information to judge this item as low or high risk of bias                                                                                                   |
| Blinding of participants and personnel (performance bias) | Unclear risk              | Insufficient information to judge this item as low or high risk of bias                                                                                                   |
| Blinding of outcome assessment (detection bias)           | Unclear risk              | Insufficient information to judge this item as low or high risk of bias                                                                                                   |
| Incomplete outcome data (attrition bias)                  | High risk                 | High levels of attrition: 31% participants were lost at follow-up                                                                                                         |
| Selective reporting (reporting bias)                      | Unclear risk              | Insufficient information to permit judgement of 'Low risk' or 'High risk                                                                                                  |
| Other bias                                                | Low risk                  | The study appears to be free of other sources of bias                                                                                                                     |

**Calderon 2013**

| <b>Bias</b>                                               | <b>Authors' judgement</b> | <b>Support for judgement</b>                                                             |
|-----------------------------------------------------------|---------------------------|------------------------------------------------------------------------------------------|
| Random sequence generation (selection bias)               | Unclear risk              | No description of the methods used to allocate participants to treatment group was given |
| Allocation concealment (selection bias)                   | Unclear risk              | Insufficient information to judge this item as low or high risk of bias                  |
| Blinding of participants and personnel (performance bias) | Unclear risk              | Insufficient information to judge this item as low or high risk of bias                  |
| Blinding of outcome assessment (detection bias)           | Unclear risk              | Insufficient information to judge this item as low or high risk of bias                  |
| Incomplete outcome data (attrition bias)                  | Unclear risk              | Insufficient information to judge this item as low or high risk of bias                  |
| Selective reporting (reporting bias)                      | Unclear risk              | Insufficient information to permit judgement of 'Low risk' or 'High risk                 |
| Other bias                                                | Low risk                  | The study appears to be free of other sources of bias                                    |

**Calvo 2016**

| <b>Bias</b>                                               | <b>Authors' judgement</b> | <b>Support for judgement</b>                                                             |
|-----------------------------------------------------------|---------------------------|------------------------------------------------------------------------------------------|
| Random sequence generation (selection bias)               | Unclear risk              | No description of the methods used to allocate participants to treatment group was given |
| Allocation concealment (selection bias)                   | Unclear risk              | Insufficient information to judge this item as low or high risk of bias                  |
| Blinding of participants and personnel (performance bias) | Unclear risk              | Insufficient information to judge this item as low or high risk of bias                  |
| Blinding of outcome assessment (detection bias)           | Unclear risk              | Insufficient information to judge this item as low or high risk of bias                  |
| Incomplete outcome data (attrition bias)                  | Unclear risk              | Insufficient information to judge this item as low or high risk of bias                  |
| Selective reporting (reporting bias)                      | Unclear risk              | Insufficient information to permit judgement of 'Low risk' or 'High risk                 |
| Other bias                                                | Low risk                  | The study appears to be free of other sources of bias                                    |

**Carriedo 2002**

| <b>Bias</b>                                               | <b>Authors' judgement</b> | <b>Support for judgement</b>                                                             |
|-----------------------------------------------------------|---------------------------|------------------------------------------------------------------------------------------|
| Random sequence generation (selection bias)               | Unclear risk              | No description of the methods used to allocate participants to treatment group was given |
| Allocation concealment (selection bias)                   | Unclear risk              | Insufficient information to judge this item as low or high risk of bias                  |
| Blinding of participants and personnel (performance bias) | Unclear risk              | Insufficient information to judge this item as low or high risk of bias                  |
| Blinding of outcome assessment (detection bias)           | Unclear risk              | Insufficient information to judge this item as low or high risk of bias                  |
| Incomplete outcome data (attrition bias)                  | Unclear risk              | Insufficient information to judge this item as low or high risk of bias                  |
| Selective reporting (reporting bias)                      | Unclear risk              | Insufficient information to permit judgement of 'Low risk' or 'High risk                 |
| Other bias                                                | Low risk                  | The study appears to be free of other sources of bias                                    |

**Castro- Menendez 2016a**

| <b>Bias</b>                                               | <b>Authors' judgement</b> | <b>Support for judgement</b>                                                             |
|-----------------------------------------------------------|---------------------------|------------------------------------------------------------------------------------------|
| Random sequence generation (selection bias)               | Unclear risk              | No description of the methods used to allocate participants to treatment group was given |
| Allocation concealment (selection bias)                   | Unclear risk              | Insufficient information to judge this item as low or high risk of bias                  |
| Blinding of participants and personnel (performance bias) | Unclear risk              | Insufficient information to judge this item as low or high risk of bias                  |
| Blinding of outcome assessment (detection bias)           | Unclear risk              | Insufficient information to judge this item as low or high risk of bias                  |
| Incomplete outcome data (attrition bias)                  | Low risk                  | No missing outcome data                                                                  |
| Selective reporting (reporting bias)                      | Unclear risk              | Insufficient information to permit judgement of 'Low risk' or 'High risk                 |
| Other bias                                                | Low risk                  | The study appears to be free of other sources of bias                                    |

**Castro-Menendez 2016b**

| <b>Bias</b>                                               | <b>Authors' judgement</b> | <b>Support for judgement</b>                                                                                                                |
|-----------------------------------------------------------|---------------------------|---------------------------------------------------------------------------------------------------------------------------------------------|
| Random sequence generation (selection bias)               | High risk                 | The investigators describe a non-random component in the sequence generation process (Assignment performed by date of clinical appointment) |
| Allocation concealment (selection bias)                   | Unclear risk              | Insufficient information to judge this item as low or high risk of bias                                                                     |
| Blinding of participants and personnel (performance bias) | Unclear risk              | Insufficient information to judge this item as low or high risk of bias                                                                     |
| Blinding of outcome assessment (detection bias)           | Unclear risk              | Insufficient information to judge this item as low or high risk of bias                                                                     |
| Incomplete outcome data (attrition bias)                  | Low risk                  | No missing outcome data                                                                                                                     |
| Selective reporting (reporting bias)                      | Unclear risk              | Insufficient information to permit judgement of 'Low risk' or 'High risk'                                                                   |
| Other bias                                                | Low risk                  | The study appears to be free of other sources of bias                                                                                       |

**Cervera-Irimia 2013**

| <b>Bias</b>                                               | <b>Authors' judgement</b> | <b>Support for judgement</b>                                                                                  |
|-----------------------------------------------------------|---------------------------|---------------------------------------------------------------------------------------------------------------|
| Random sequence generation (selection bias)               | Unclear risk              | No description of the methods used to allocate participants to treatment group was given                      |
| Allocation concealment (selection bias)                   | Low risk                  | Participants and investigators enrolling participants could not foresee assignment (opaque, sealed envelopes) |
| Blinding of participants and personnel (performance bias) | Unclear risk              | Insufficient information to judge this item as low or high risk of bias                                       |
| Blinding of outcome assessment (detection bias)           | Unclear risk              | Insufficient information to judge this item as low or high risk of bias                                       |
| Incomplete outcome data (attrition bias)                  | Unclear risk              | Insufficient reporting of attrition/exclusions to permit judgement of 'Low risk' or 'High risk'               |
| Selective reporting (reporting bias)                      | Unclear risk              | Insufficient information to permit judgement of 'Low risk' or 'High risk'                                     |
| Other bias                                                | Low risk                  | The study appears to be free of other sources of bias                                                         |

**Cervin 2005**

| <b>Bias</b>                                               | <b>Authors' judgement</b> | <b>Support for judgement</b>                                                                                        |
|-----------------------------------------------------------|---------------------------|---------------------------------------------------------------------------------------------------------------------|
| Random sequence generation (selection bias)               | Low risk                  | The investigators describe a random component in the sequence generation process (computer random number generator) |
| Allocation concealment (selection bias)                   | Unclear risk              | Insufficient information to judge this item as low or high risk of bias                                             |
| Blinding of participants and personnel (performance bias) | Unclear risk              | Insufficient information to judge this item as low or high risk of bias                                             |
| Blinding of outcome assessment (detection bias)           | Unclear risk              | Insufficient information to judge this item as low or high risk of bias                                             |
| Incomplete outcome data (attrition bias)                  | Low risk                  | No missing outcome data                                                                                             |
| Selective reporting (reporting bias)                      | Unclear risk              | Insufficient information to permit judgement of 'Low risk' or 'High risk                                            |
| Other bias                                                | Low risk                  | The study appears to be free of other sources of bias                                                               |

**Chialva 2013**

| <b>Bias</b>                                               | <b>Authors' judgement</b> | <b>Support for judgement</b>                                                                  |
|-----------------------------------------------------------|---------------------------|-----------------------------------------------------------------------------------------------|
| Random sequence generation (selection bias)               | Unclear risk              | No description of the methods used to allocate participants to treatment group was given      |
| Allocation concealment (selection bias)                   | Unclear risk              | Insufficient information to judge this item as low or high risk of bias                       |
| Blinding of participants and personnel (performance bias) | Unclear risk              | Insufficient information to judge this item as low or high risk of bias                       |
| Blinding of outcome assessment (detection bias)           | Low risk                  | Blinding of outcome assessment ensured, and unlikely that the blinding could have been broken |
| Incomplete outcome data (attrition bias)                  | Low risk                  | No missing outcome data                                                                       |
| Selective reporting (reporting bias)                      | Unclear risk              | Insufficient information to permit judgement of 'Low risk' or 'High risk                      |
| Other bias                                                | Low risk                  | The study appears to be free of other sources of bias                                         |

**De Agostino 2004**

| Bias                                                      | Authors' judgement | Support for judgement                                                                                  |
|-----------------------------------------------------------|--------------------|--------------------------------------------------------------------------------------------------------|
| Random sequence generation (selection bias)               | High risk          | The investigators describe a non-random component in the sequence generation process (alternating way) |
| Allocation concealment (selection bias)                   | Unclear risk       | Insufficient information to judge this item as low or high risk of bias                                |
| Blinding of participants and personnel (performance bias) | Unclear risk       | Insufficient information to judge this item as low or high risk of bias                                |
| Blinding of outcome assessment (detection bias)           | Unclear risk       | Insufficient information to judge this item as low or high risk of bias                                |
| Incomplete outcome data (attrition bias)                  | High risk          | High levels of attrition: 37% of participants were lost at follow-up                                   |
| Selective reporting (reporting bias)                      | Unclear risk       | Insufficient information to judge this item as low or high risk of bias                                |
| Other bias                                                | Low risk           | The study appears to be free of other sources of bias                                                  |

**De Napoli 2016**

| Bias                                                      | Authors' judgement | Support for judgement                                                                                                                                            |
|-----------------------------------------------------------|--------------------|------------------------------------------------------------------------------------------------------------------------------------------------------------------|
| Random sequence generation (selection bias)               | Low risk           | The investigators describe a random component in the sequence generation process (throwing dice)                                                                 |
| Allocation concealment (selection bias)                   | Low risk           | Participants and investigators enrolling participants could not foresee assignment (opaque, sealed envelopes were used)                                          |
| Blinding of participants and personnel (performance bias) | Unclear risk       | Insufficient information to judge this item as low or high risk of bias                                                                                          |
| Blinding of outcome assessment (detection bias)           | Low risk           | No blinding of outcome assessment, but the review authors judge that the outcome measurement is not likely to be influenced by lack of blinding                  |
| Incomplete outcome data (attrition bias)                  | Low risk           | the proportion of missing outcomes compared with observed event risk not enough to have a clinically relevant impact on the intervention effect estimate (1.61%) |
| Selective reporting (reporting bias)                      | Unclear risk       | Insufficient information to permit judgement of 'Low risk' or 'High risk'                                                                                        |
| Other bias                                                | Low risk           | The study appears to be free of other sources of bias                                                                                                            |

**Farfalli 2007**

| <b>Bias</b>                                               | <b>Authors' judgement</b> | <b>Support for judgement</b>                                                                           |
|-----------------------------------------------------------|---------------------------|--------------------------------------------------------------------------------------------------------|
| Random sequence generation (selection bias)               | Low risk                  | The investigators describe a random component in the sequence generation process (Random number table) |
| Allocation concealment (selection bias)                   | Unclear risk              | Insufficient information to judge this item as low or high risk of bias                                |
| Blinding of participants and personnel (performance bias) | Unclear risk              | Insufficient information to judge this item as low or high risk of bias                                |
| Blinding of outcome assessment (detection bias)           | Unclear risk              | Insufficient information to judge this item as low or high risk of bias                                |
| Incomplete outcome data (attrition bias)                  | Low risk                  | No missing outcome data                                                                                |
| Selective reporting (reporting bias)                      | Unclear risk              | Insufficient information to permit judgement of 'Low risk' or 'High risk                               |
| Other bias                                                | Low risk                  | The study appears to be free of other sources of bias                                                  |

**Fernandez 2014**

| <b>Bias</b>                                               | <b>Authors' judgement</b> | <b>Support for judgement</b>                                                             |
|-----------------------------------------------------------|---------------------------|------------------------------------------------------------------------------------------|
| Random sequence generation (selection bias)               | Unclear risk              | No description of the methods used to allocate participants to treatment group was given |
| Allocation concealment (selection bias)                   | Unclear risk              | Insufficient information to judge this item as low or high risk of bias                  |
| Blinding of participants and personnel (performance bias) | Unclear risk              | Insufficient information to judge this item as low or high risk of bias                  |
| Blinding of outcome assessment (detection bias)           | Unclear risk              | Insufficient information to judge this item as low or high risk of bias                  |
| Incomplete outcome data (attrition bias)                  | Low risk                  | No missing outcome data                                                                  |
| Selective reporting (reporting bias)                      | Unclear risk              | Insufficient information to permit judgement of 'Low risk' or 'High risk                 |
| Other bias                                                | Low risk                  | The study appears to be free of other sources of bias                                    |

**Gutiérrez 2009**

| <b>Bias</b>                                               | <b>Authors' judgement</b> | <b>Support for judgement</b>                                                                           |
|-----------------------------------------------------------|---------------------------|--------------------------------------------------------------------------------------------------------|
| Random sequence generation (selection bias)               | Low risk                  | The investigators describe a random component in the sequence generation process (Random number table) |
| Allocation concealment (selection bias)                   | Unclear risk              | Insufficient information to judge this item as low or high risk of bias                                |
| Blinding of participants and personnel (performance bias) | Unclear risk              | Insufficient information to judge this item as low or high risk of bias                                |
| Blinding of outcome assessment (detection bias)           | Unclear risk              | Insufficient information to judge this item as low or high risk of bias                                |
| Incomplete outcome data (attrition bias)                  | Low risk                  | No missing outcome data                                                                                |
| Selective reporting (reporting bias)                      | Unclear risk              | Insufficient information to permit judgement of 'Low risk' or 'High risk                               |
| Other bias                                                | Low risk                  | The study appears to be free of other sources of bias                                                  |

**Hernández 2003**

| <b>Bias</b>                                               | <b>Authors' judgement</b> | <b>Support for judgement</b>                                                                                                         |
|-----------------------------------------------------------|---------------------------|--------------------------------------------------------------------------------------------------------------------------------------|
| Random sequence generation (selection bias)               | Unclear risk              | No description of the methods used to allocate participants to treatment group was given                                             |
| Allocation concealment (selection bias)                   | Unclear risk              | Insufficient information to judge this item as low or high risk of bias                                                              |
| Blinding of participants and personnel (performance bias) | Low risk                  | No blinding or incomplete blinding, but the review authors judge that the outcome is not likely to be influenced by lack of blinding |
| Blinding of outcome assessment (detection bias)           | Low risk                  | Blinding of outcome assessment ensured, and unlikely that the blinding could have been broken                                        |
| Incomplete outcome data (attrition bias)                  | Unclear risk              | Insufficient information to judge this item as low or high risk of bias                                                              |
| Selective reporting (reporting bias)                      | Unclear risk              | Insufficient information to permit judgement of 'Low risk' or 'High risk                                                             |
| Other bias                                                | Low risk                  | The study appears to be free of other sources of bias                                                                                |



**Holguín 2007**

| <b>Bias</b>                                               | <b>Authors' judgement</b> | <b>Support for judgement</b>                                                                                                              |
|-----------------------------------------------------------|---------------------------|-------------------------------------------------------------------------------------------------------------------------------------------|
| Random sequence generation (selection bias)               | High risk                 | The investigators describe a non-random component in the sequence generation process (Assignment performed by day of hospital attendance) |
| Allocation concealment (selection bias)                   | Unclear risk              | Insufficient information to judge this item as low or high risk of bias                                                                   |
| Blinding of participants and personnel (performance bias) | Unclear risk              | Insufficient information to judge this item as low or high risk of bias                                                                   |
| Blinding of outcome assessment (detection bias)           | Unclear risk              | Insufficient information to judge this item as low or high risk of bias                                                                   |
| Incomplete outcome data (attrition bias)                  | Low risk                  | No missing outcome data                                                                                                                   |
| Selective reporting (reporting bias)                      | Unclear risk              | Insufficient information to permit judgement of 'Low risk' or 'High risk'                                                                 |
| Other bias                                                | Low risk                  | The study appears to be free of other sources of bias                                                                                     |

**Juárez 2013**

| <b>Bias</b>                                               | <b>Authors' judgement</b> | <b>Support for judgement</b>                                                                                                      |
|-----------------------------------------------------------|---------------------------|-----------------------------------------------------------------------------------------------------------------------------------|
| Random sequence generation (selection bias)               | High risk                 | The investigators describe a non-random component in the sequence generation process (Patient were assigned by an advisory board) |
| Allocation concealment (selection bias)                   | Unclear risk              | Insufficient information to judge this item as low or high risk of bias                                                           |
| Blinding of participants and personnel (performance bias) | Unclear risk              | Insufficient information to judge this item as low or high risk of bias                                                           |
| Blinding of outcome assessment (detection bias)           | Unclear risk              | Insufficient information to judge this item as low or high risk of bias                                                           |
| Incomplete outcome data (attrition bias)                  | Unclear risk              | Insufficient information to judge this item as low or high risk of bias                                                           |
| Selective reporting (reporting bias)                      | Unclear risk              | Insufficient information to permit judgement of 'Low risk' or 'High risk'                                                         |
| Other bias                                                | Low risk                  | The study appears to be free of other sources of bias                                                                             |

**López 2002**

| <b>Bias</b>                                               | <b>Authors' judgement</b> | <b>Support for judgement</b>                                                                                                                |
|-----------------------------------------------------------|---------------------------|---------------------------------------------------------------------------------------------------------------------------------------------|
| Random sequence generation (selection bias)               | High risk                 | The investigators describe a non-random component in the sequence generation process (Assignment performed by clinical registration number) |
| Allocation concealment (selection bias)                   | Unclear risk              | Insufficient information to judge this item as low or high risk of bias                                                                     |
| Blinding of participants and personnel (performance bias) | Unclear risk              | Insufficient information to judge this item as low or high risk of bias                                                                     |
| Blinding of outcome assessment (detection bias)           | Unclear risk              | Insufficient information to judge this item as low or high risk of bias                                                                     |
| Incomplete outcome data (attrition bias)                  | High risk                 | High levels of attrition: Around 31%-37% of participants were lost at follow-up                                                             |
| Selective reporting (reporting bias)                      | Unclear risk              | Insufficient information to judge this item as low or high risk of bias                                                                     |
| Other bias                                                | Low risk                  | The study appears to be free of other sources of bias                                                                                       |

**López 2015**

| <b>Bias</b>                                               | <b>Authors' judgement</b> | <b>Support for judgement</b>                                                                                                                                     |
|-----------------------------------------------------------|---------------------------|------------------------------------------------------------------------------------------------------------------------------------------------------------------|
| Random sequence generation (selection bias)               | High risk                 | The investigators describe a non-random component in the sequence generation process (Assignment performed by day of birth)                                      |
| Allocation concealment (selection bias)                   | High risk                 | Participants or investigators enrolling participants could possibly foresee assignments and thus introduce selection bias (Assignment performed by day of birth) |
| Blinding of participants and personnel (performance bias) | Unclear risk              | Insufficient information to judge this item as low or high risk of bias                                                                                          |
| Blinding of outcome assessment (detection bias)           | Unclear risk              | Insufficient information to judge this item as low or high risk of bias                                                                                          |
| Incomplete outcome data (attrition bias)                  | High risk                 | High levels of attrition: 46.1% of participants were lost at follow-up                                                                                           |
| Selective reporting (reporting bias)                      | Unclear risk              | Insufficient information to judge this item as low or high risk of bias                                                                                          |
| Other bias                                                | Low risk                  | The study appears to be free of other sources of bias                                                                                                            |

**Marquéz 2015**

| <b>Bias</b>                                               | <b>Authors' judgement</b> | <b>Support for judgement</b>                                                             |
|-----------------------------------------------------------|---------------------------|------------------------------------------------------------------------------------------|
| Random sequence generation (selection bias)               | Unclear risk              | No description of the methods used to allocate participants to treatment group was given |
| Allocation concealment (selection bias)                   | Unclear risk              | Insufficient information to judge this item as low or high risk of bias                  |
| Blinding of participants and personnel (performance bias) | Unclear risk              | Insufficient information to judge this item as low or high risk of bias                  |
| Blinding of outcome assessment (detection bias)           | Unclear risk              | Insufficient information to judge this item as low or high risk of bias                  |
| Incomplete outcome data (attrition bias)                  | Low risk                  | No missing outcome data                                                                  |
| Selective reporting (reporting bias)                      | Unclear risk              | Insufficient information to judge this item as low or high risk of bias                  |
| Other bias                                                | Low risk                  | The study appears to be free of other sources of bias                                    |

**Martínez 2003**

| <b>Bias</b>                                               | <b>Authors' judgement</b> | <b>Support for judgement</b>                                                                                 |
|-----------------------------------------------------------|---------------------------|--------------------------------------------------------------------------------------------------------------|
| Random sequence generation (selection bias)               | High risk                 | The investigators describe a non-random component in the sequence generation process.(sequential assignment) |
| Allocation concealment (selection bias)                   | Unclear risk              | Insufficient information to judge this item as low or high risk of bias                                      |
| Blinding of participants and personnel (performance bias) | Unclear risk              | Insufficient information to judge this item as low or high risk of bias                                      |
| Blinding of outcome assessment (detection bias)           | Unclear risk              | Blinding of outcome assessment ensured, and unlikely that the blinding could have been broken                |
| Incomplete outcome data (attrition bias)                  | Unclear risk              | Insufficient information to judge this item as low or high risk of bias                                      |
| Selective reporting (reporting bias)                      | Unclear risk              | Insufficient information to judge this item as low or high risk of bias                                      |
| Other bias                                                | Low risk                  | The study appears to be free of other sources of bias                                                        |

**Martínez 2015**

| <b>Bias</b>                                               | <b>Authors' judgement</b> | <b>Support for judgement</b>                                                                                         |
|-----------------------------------------------------------|---------------------------|----------------------------------------------------------------------------------------------------------------------|
| Random sequence generation (selection bias)               | Low risk                  | The investigators describe a random component in the sequence generation process ( computer random number generator) |
| Allocation concealment (selection bias)                   | Unclear risk              | Insufficient information to judge this item as low or high risk of bias                                              |
| Blinding of participants and personnel (performance bias) | Unclear risk              | Insufficient information to judge this item as low or high risk of bias                                              |
| Blinding of outcome assessment (detection bias)           | Low risk                  | Blinding of outcome assessment ensured, and unlikely that the blinding could have been broken                        |
| Incomplete outcome data (attrition bias)                  | Low risk                  | No missing outcome data                                                                                              |
| Selective reporting (reporting bias)                      | Unclear risk              | Insufficient information to judge this item as low or high risk of bias                                              |
| Other bias                                                | Low risk                  | The study appears to be free of other sources of bias                                                                |

**Mas-Atance 2001**

| <b>Bias</b>                                               | <b>Authors' judgement</b> | <b>Support for judgement</b>                                                                                  |
|-----------------------------------------------------------|---------------------------|---------------------------------------------------------------------------------------------------------------|
| Random sequence generation (selection bias)               | Unclear risk              | No description of the methods used to allocate participants to treatment group was given                      |
| Allocation concealment (selection bias)                   | Low risk                  | Participants and investigators enrolling participants could not foresee assignment (opaque, sealed envelopes) |
| Blinding of participants and personnel (performance bias) | Unclear risk              | Insufficient information to judge this item as low or high risk of bias                                       |
| Blinding of outcome assessment (detection bias)           | Unclear risk              | Insufficient information to judge this item as low or high risk of bias                                       |
| Incomplete outcome data (attrition bias)                  | Low risk                  | No missing outcome data                                                                                       |
| Selective reporting (reporting bias)                      | Unclear risk              | Insufficient information to judge this item as low or high risk of bias                                       |
| Other bias                                                | Low risk                  | The study appears to be free of other sources of bias                                                         |

**Mencia 2005**

| <b>Bias</b>                                               | <b>Authors' judgement</b> | <b>Support for judgement</b>                                                             |
|-----------------------------------------------------------|---------------------------|------------------------------------------------------------------------------------------|
| Random sequence generation (selection bias)               | Unclear risk              | No description of the methods used to allocate participants to treatment group was given |
| Allocation concealment (selection bias)                   | Unclear risk              | Insufficient information to judge this item as low or high risk of bias                  |
| Blinding of participants and personnel (performance bias) | Unclear risk              | Insufficient information to judge this item as low or high risk of bias                  |
| Blinding of outcome assessment (detection bias)           | Unclear risk              | Insufficient information to judge this item as low or high risk of bias                  |
| Incomplete outcome data (attrition bias)                  | Low risk                  | No missing outcome data                                                                  |
| Selective reporting (reporting bias)                      | Unclear risk              | Insufficient information to judge this item as low or high risk of bias                  |
| Other bias                                                | Low risk                  | The study appears to be free of other sources of bias                                    |

**Molano 2015**

| <b>Bias</b>                                               | <b>Authors' judgement</b> | <b>Support for judgement</b>                                                                           |
|-----------------------------------------------------------|---------------------------|--------------------------------------------------------------------------------------------------------|
| Random sequence generation (selection bias)               | Low risk                  | The investigators describe a random component in the sequence generation process (random number table) |
| Allocation concealment (selection bias)                   | Unclear risk              | Insufficient information to judge this item as low or high risk of bias                                |
| Blinding of participants and personnel (performance bias) | Unclear risk              | Insufficient information to judge this item as low or high risk of bias                                |
| Blinding of outcome assessment (detection bias)           | Unclear risk              | Insufficient information to judge this item as low or high risk of bias                                |
| Incomplete outcome data (attrition bias)                  | Low risk                  | No missing outcome data                                                                                |
| Selective reporting (reporting bias)                      | Unclear risk              | Insufficient information to judge this item as low or high risk of bias                                |
| Other bias                                                | Low risk                  | The study appears to be free of other sources of bias                                                  |

**Olivares 2004**

| <b>Bias</b>                                               | <b>Authors' judgement</b> | <b>Support for judgement</b>                                                                       |
|-----------------------------------------------------------|---------------------------|----------------------------------------------------------------------------------------------------|
| Random sequence generation (selection bias)               | Low risk                  | The investigators describe a random component in the sequence generation process (shuffling cards) |
| Allocation concealment (selection bias)                   | Unclear risk              | Insufficient information to judge this item as low or high risk of bias                            |
| Blinding of participants and personnel (performance bias) | Unclear risk              | Insufficient information to judge this item as low or high risk of bias                            |
| Blinding of outcome assessment (detection bias)           | Unclear risk              | Insufficient information to judge this item as low or high risk of bias                            |
| Incomplete outcome data (attrition bias)                  | Low risk                  | No missing outcome data                                                                            |
| Selective reporting (reporting bias)                      | Unclear risk              | Insufficient information to judge this item as low or high risk of bias                            |
| Other bias                                                | Low risk                  | The study appears to be free of other sources of bias                                              |

**Ortíz 2014**

| <b>Bias</b>                                               | <b>Authors' judgement</b> | <b>Support for judgement</b>                                                                                                      |
|-----------------------------------------------------------|---------------------------|-----------------------------------------------------------------------------------------------------------------------------------|
| Random sequence generation (selection bias)               | High risk                 | The investigators describe a non-random component in the sequence generation process (Assignment performed by the age of patient) |
| Allocation concealment (selection bias)                   | Unclear risk              | Insufficient information to judge this item as low or high risk of bias                                                           |
| Blinding of participants and personnel (performance bias) | Unclear risk              | Insufficient information to judge this item as low or high risk of bias                                                           |
| Blinding of outcome assessment (detection bias)           | Unclear risk              | Insufficient information to judge this item as low or high risk of bias                                                           |
| Incomplete outcome data (attrition bias)                  | Low risk                  | No missing outcome data                                                                                                           |
| Selective reporting (reporting bias)                      | Unclear risk              | Insufficient information to judge this item as low or high risk of bias                                                           |
| Other bias                                                | Low risk                  | The study appears to be free of other sources of bias                                                                             |

**Palma 2015**

| <b>Bias</b>                                               | <b>Authors' judgement</b> | <b>Support for judgement</b>                                                                                                                          |
|-----------------------------------------------------------|---------------------------|-------------------------------------------------------------------------------------------------------------------------------------------------------|
| Random sequence generation (selection bias)               | Low risk                  | The investigators describe a random component in the sequence generation process (computer random number generator) Algoritmo generado por computador |
| Allocation concealment (selection bias)                   | Unclear risk              | Insufficient information to judge this item as low or high risk of bias                                                                               |
| Blinding of participants and personnel (performance bias) | Low risk                  | Blinding of participants and key study personnel ensured, and unlikely that the blinding could have been broken                                       |
| Blinding of outcome assessment (detection bias)           | Low risk                  | Blinding of outcome assessment ensured, and unlikely that the blinding could have been broken                                                         |
| Incomplete outcome data (attrition bias)                  | High risk                 | 'As-treated' analysis done with substantial departure of the intervention received from that assigned at randomization                                |
| Selective reporting (reporting bias)                      | Unclear risk              | Insufficient information to judge this item as low or high risk of bias                                                                               |
| Other bias                                                | Low risk                  | The study appears to be free of other sources of bias                                                                                                 |

**Pereda 2006**

| <b>Bias</b>                                               | <b>Authors' judgement</b> | <b>Support for judgement</b>                                                                                        |
|-----------------------------------------------------------|---------------------------|---------------------------------------------------------------------------------------------------------------------|
| Random sequence generation (selection bias)               | Low risk                  | The investigators describe a random component in the sequence generation process (computer random number generator) |
| Allocation concealment (selection bias)                   | Unclear risk              | Insufficient information to judge this item as low or high risk of bias                                             |
| Blinding of participants and personnel (performance bias) | Unclear risk              | Insufficient information to judge this item as low or high risk of bias                                             |
| Blinding of outcome assessment (detection bias)           | Unclear risk              | Insufficient information to judge this item as low or high risk of bias                                             |
| Incomplete outcome data (attrition bias)                  | Unclear risk              | Insufficient information to judge this item as low or high risk of bias                                             |
| Selective reporting (reporting bias)                      | Unclear risk              | Insufficient information to judge this item as low or high risk of bias                                             |
| Other bias                                                | Low risk                  | The study appears to be free of other sources of bias                                                               |

**Pescador 2011**

| <b>Bias</b>                                               | <b>Authors' judgement</b> | <b>Support for judgement</b>                                                                                                                                    |
|-----------------------------------------------------------|---------------------------|-----------------------------------------------------------------------------------------------------------------------------------------------------------------|
| Random sequence generation (selection bias)               | Unclear risk              | No description of the methods used to allocate participants to treatment group was given                                                                        |
| Allocation concealment (selection bias)                   | Unclear risk              | Insufficient information to judge this item as low or high risk of bias                                                                                         |
| Blinding of participants and personnel (performance bias) | Unclear risk              | Insufficient information to judge this item as low or high risk of bias                                                                                         |
| Blinding of outcome assessment (detection bias)           | Unclear risk              | Insufficient information to judge this item as low or high risk of bias                                                                                         |
| Incomplete outcome data (attrition bias)                  | Low risk                  | the proportion of missing outcomes compared with observed event risk not enough to have a clinically relevant impact on the intervention effect estimate (5.2%) |
| Selective reporting (reporting bias)                      | Unclear risk              | Insufficient information to judge this item as low or high risk of bias                                                                                         |
| Other bias                                                | Low risk                  | The study appears to be free of other sources of bias                                                                                                           |

**Pesciallo 2009**

| <b>Bias</b>                                               | <b>Authors' judgement</b> | <b>Support for judgement</b>                                                                                       |
|-----------------------------------------------------------|---------------------------|--------------------------------------------------------------------------------------------------------------------|
| Random sequence generation (selection bias)               | High risk                 | The investigators describe a non-random component in the sequence generation process (Assignment by even/odd knee) |
| Allocation concealment (selection bias)                   | Unclear risk              | Insufficient information to judge this item as low or high risk of bias                                            |
| Blinding of participants and personnel (performance bias) | Unclear risk              | Insufficient information to judge this item as low or high risk of bias                                            |
| Blinding of outcome assessment (detection bias)           | Unclear risk              | Insufficient information to judge this item as low or high risk of bias                                            |
| Incomplete outcome data (attrition bias)                  | Low risk                  | No missing outcome data                                                                                            |
| Selective reporting (reporting bias)                      | Unclear risk              | Insufficient information to judge this item as low or high risk of bias                                            |
| Other bias                                                | Low risk                  | The study appears to be free of other sources of bias                                                              |



**Pesciallo 2015**

| <b>Bias</b>                                               | <b>Authors' judgement</b> | <b>Support for judgement</b>                                                             |
|-----------------------------------------------------------|---------------------------|------------------------------------------------------------------------------------------|
| Random sequence generation (selection bias)               | Unclear risk              | No description of the methods used to allocate participants to treatment group was given |
| Allocation concealment (selection bias)                   | Unclear risk              | Insufficient information to judge this item as low or high risk of bias                  |
| Blinding of participants and personnel (performance bias) | Unclear risk              | Insufficient information to judge this item as low or high risk of bias                  |
| Blinding of outcome assessment (detection bias)           | Unclear risk              | Insufficient information to judge this item as low or high risk of bias                  |
| Incomplete outcome data (attrition bias)                  | Low risk                  | No missing outcome data                                                                  |
| Selective reporting (reporting bias)                      | Unclear risk              | Insufficient information to judge this item as low or high risk of bias                  |
| Other bias                                                | Low risk                  | The study appears to be free of other sources of bias                                    |

**Prieto 2009**

| <b>Bias</b>                                               | <b>Authors' judgement</b> | <b>Support for judgement</b>                                                                                                                                  |
|-----------------------------------------------------------|---------------------------|---------------------------------------------------------------------------------------------------------------------------------------------------------------|
| Random sequence generation (selection bias)               | High risk                 | The investigators describe a non-random component in the sequence generation process (Order by exit of surgery was used)                                      |
| Allocation concealment (selection bias)                   | High risk                 | Participants or investigators enrolling participants could possibly foresee assignments and thus introduce selection bias (Order by exit of surgery was used) |
| Blinding of participants and personnel (performance bias) | Unclear risk              | Insufficient information to judge this item as low or high risk of bias                                                                                       |
| Blinding of outcome assessment (detection bias)           | Unclear risk              | Insufficient information to judge this item as low or high risk of bias                                                                                       |
| Incomplete outcome data (attrition bias)                  | Unclear risk              | Insufficient information to judge this item as low or high risk of bias                                                                                       |
| Selective reporting (reporting bias)                      | Unclear risk              | Insufficient information to judge this item as low or high risk of bias                                                                                       |
| Other bias                                                | Low risk                  | The study appears to be free of other sources of bias                                                                                                         |

**Pérez 2011**

| <b>Bias</b>                                               | <b>Authors' judgement</b> | <b>Support for judgement</b>                                                             |
|-----------------------------------------------------------|---------------------------|------------------------------------------------------------------------------------------|
| Random sequence generation (selection bias)               | Unclear risk              | No description of the methods used to allocate participants to treatment group was given |
| Allocation concealment (selection bias)                   | Unclear risk              | Insufficient information to judge this item as low or high risk of bias                  |
| Blinding of participants and personnel (performance bias) | Unclear risk              | Insufficient information to judge this item as low or high risk of bias                  |
| Blinding of outcome assessment (detection bias)           | Unclear risk              | Insufficient information to judge this item as low or high risk of bias                  |
| Incomplete outcome data (attrition bias)                  | Low risk                  | No missing outcome data                                                                  |
| Selective reporting (reporting bias)                      | Unclear risk              | Insufficient information to judge this item as low or high risk of bias                  |
| Other bias                                                | Low risk                  | The study appears to be free of other sources of bias                                    |

**Restrepo 2007**

| <b>Bias</b>                                               | <b>Authors' judgement</b> | <b>Support for judgement</b>                                                                                    |
|-----------------------------------------------------------|---------------------------|-----------------------------------------------------------------------------------------------------------------|
| Random sequence generation (selection bias)               | Low risk                  | The investigators describe a random component in the sequence generation process (Random number table)          |
| Allocation concealment (selection bias)                   | Unclear risk              | Insufficient information to judge this item as low or high risk of bias                                         |
| Blinding of participants and personnel (performance bias) | Low risk                  | Blinding of participants and key study personnel ensured, and unlikely that the blinding could have been broken |
| Blinding of outcome assessment (detection bias)           | Low risk                  | Blinding of outcome assessment ensured, and unlikely that the blinding could have been broken                   |
| Incomplete outcome data (attrition bias)                  | Low risk                  | No missing outcome data                                                                                         |
| Selective reporting (reporting bias)                      | Unclear risk              | Insufficient information to judge this item as low or high risk of bias                                         |
| Other bias                                                | Low risk                  | The study appears to be free of other sources of bias                                                           |

**Rojas 2005**

| <b>Bias</b>                                               | <b>Authors' judgement</b> | <b>Support for judgement</b>                                                             |
|-----------------------------------------------------------|---------------------------|------------------------------------------------------------------------------------------|
| Random sequence generation (selection bias)               | Unclear risk              | Insufficient information to judge this item as low or high risk of                       |
| Allocation concealment (selection bias)                   | Unclear risk              | No description of the methods used to allocate participants to treatment group was given |
| Blinding of participants and personnel (performance bias) | Unclear risk              | Insufficient information to judge this item as low or high risk of bias                  |
| Blinding of outcome assessment (detection bias)           | Unclear risk              | Insufficient information to judge this item as low or high risk of bias                  |
| Incomplete outcome data (attrition bias)                  | Low risk                  | No missing outcome data                                                                  |
| Selective reporting (reporting bias)                      | Unclear risk              | Insufficient information to judge this item as low or high risk of bias                  |
| Other bias                                                | Low risk                  | The study appears to be free of other sources of bias                                    |

**Salles 2012**

| <b>Bias</b>                                               | <b>Authors' judgement</b> | <b>Support for judgement</b>                                                             |
|-----------------------------------------------------------|---------------------------|------------------------------------------------------------------------------------------|
| Random sequence generation (selection bias)               | Unclear risk              | No description of the methods used to allocate participants to treatment group was given |
| Allocation concealment (selection bias)                   | Unclear risk              | Insufficient information to judge this item as low or high risk of bias                  |
| Blinding of participants and personnel (performance bias) | Unclear risk              | Insufficient information to judge this item as low or high risk of bias                  |
| Blinding of outcome assessment (detection bias)           | Unclear risk              | Insufficient information to judge this item as low or high risk of bias                  |
| Incomplete outcome data (attrition bias)                  | Low risk                  | No missing outcome data                                                                  |
| Selective reporting (reporting bias)                      | Unclear risk              | Insufficient information to judge this item as low or high risk of bias                  |
| Other bias                                                | Low risk                  | The study appears to be free of other sources of bias                                    |

**Sangüesa 2006**

| <b>Bias</b>                                               | <b>Authors' judgement</b> | <b>Support for judgement</b>                                                             |
|-----------------------------------------------------------|---------------------------|------------------------------------------------------------------------------------------|
| Random sequence generation (selection bias)               | Unclear risk              | No description of the methods used to allocate participants to treatment group was given |
| Allocation concealment (selection bias)                   | Unclear risk              | Insufficient information to judge this item as low or high risk of bias                  |
| Blinding of participants and personnel (performance bias) | Unclear risk              | Insufficient information to judge this item as low or high risk of bias                  |
| Blinding of outcome assessment (detection bias)           | Unclear risk              | Insufficient information to judge this item as low or high risk of bias                  |
| Incomplete outcome data (attrition bias)                  | Low risk                  | No missing outcome data                                                                  |
| Selective reporting (reporting bias)                      | Unclear risk              | Insufficient information to judge this item as low or high risk of bias                  |
| Other bias                                                | Low risk                  | The study appears to be free of other sources of bias                                    |

**Sebastián 2001**

| <b>Bias</b>                                               | <b>Authors' judgement</b> | <b>Support for judgement</b>                                                                                                                    |
|-----------------------------------------------------------|---------------------------|-------------------------------------------------------------------------------------------------------------------------------------------------|
| Random sequence generation (selection bias)               | Unclear risk              | No description of the methods used to allocate participants to treatment group was given                                                        |
| Allocation concealment (selection bias)                   | Unclear risk              | Insufficient information to judge this item as low or high risk of bias                                                                         |
| Blinding of participants and personnel (performance bias) | Unclear risk              | No blinding or incomplete blinding, but the review authors judge that the outcome is not likely to be influenced by lack of blinding            |
| Blinding of outcome assessment (detection bias)           | Low risk                  | No blinding of outcome assessment, but the review authors judge that the outcome measurement is not likely to be influenced by lack of blinding |
| Incomplete outcome data (attrition bias)                  | Unclear risk              | Insufficient information to judge this item as low or high risk of bias                                                                         |
| Selective reporting (reporting bias)                      | Unclear risk              | Insufficient information to judge this item as low or high risk of bias                                                                         |
| Other bias                                                | Low risk                  | The study appears to be free of other sources of bias                                                                                           |

**Sebastián 2012**

| <b>Bias</b>                                               | <b>Authors' judgement</b> | <b>Support for judgement</b>                                                                                  |
|-----------------------------------------------------------|---------------------------|---------------------------------------------------------------------------------------------------------------|
| Random sequence generation (selection bias)               | Unclear risk              | No description of the methods used to allocate participants to treatment group was given                      |
| Allocation concealment (selection bias)                   | Unclear risk              | No description of the methods used to allocate participants to treatment group was given                      |
| Blinding of participants and personnel (performance bias) | High risk                 | No blinding or incomplete blinding, and the outcome is likely to be influenced by lack of blinding            |
| Blinding of outcome assessment (detection bias)           | High risk                 | No blinding of outcome assessment, and the outcome measurement is likely to be influenced by lack of blinding |
| Incomplete outcome data (attrition bias)                  | Low risk                  | No missing outcome data                                                                                       |
| Selective reporting (reporting bias)                      | Unclear risk              | Insufficient information to judge this item as low or high risk of bias                                       |
| Other bias                                                | Low risk                  | The study appears to be free of other sources of bias                                                         |

**Sánchez 2000**

| <b>Bias</b>                                               | <b>Authors' judgement</b> | <b>Support for judgement</b>                                                                                                               |
|-----------------------------------------------------------|---------------------------|--------------------------------------------------------------------------------------------------------------------------------------------|
| Random sequence generation (selection bias)               | High risk                 | The investigators describe a non-random component in the sequence generation process (Assignment performed by day of hospital appointment) |
| Allocation concealment (selection bias)                   | Unclear risk              | Insufficient information to judge this item as low or high risk of bias                                                                    |
| Blinding of participants and personnel (performance bias) | Unclear risk              | Insufficient information to judge this item as low or high risk of bias                                                                    |
| Blinding of outcome assessment (detection bias)           | Unclear risk              | Insufficient information to judge this item as low or high risk of bias                                                                    |
| Incomplete outcome data (attrition bias)                  | Low risk                  | No missing outcome data                                                                                                                    |
| Selective reporting (reporting bias)                      | Unclear risk              | Insufficient information to judge this item as low or high risk of bias                                                                    |
| Other bias                                                | Low risk                  | The study appears to be free of other sources of bias                                                                                      |

**Trueba 2003**

| <b>Bias</b>                                               | <b>Authors' judgement</b> | <b>Support for judgement</b>                                                             |
|-----------------------------------------------------------|---------------------------|------------------------------------------------------------------------------------------|
| Random sequence generation (selection bias)               | Unclear risk              | No description of the methods used to allocate participants to treatment group was given |
| Allocation concealment (selection bias)                   | Unclear risk              | Insufficient information to judge this item as low or high risk of bias                  |
| Blinding of participants and personnel (performance bias) | Unclear risk              | Insufficient information to judge this item as low or high risk of bias                  |
| Blinding of outcome assessment (detection bias)           | Unclear risk              | Insufficient information to judge this item as low or high risk of bias                  |
| Incomplete outcome data (attrition bias)                  | Low risk                  | No missing outcome data                                                                  |
| Selective reporting (reporting bias)                      | Unclear risk              | Insufficient information to judge this item as low or high risk of bias                  |
| Other bias                                                | Low risk                  | The study appears to be free of other sources of bias                                    |

**Utrilla 1998**

| <b>Bias</b>                                               | <b>Authors' judgement</b> | <b>Support for judgement</b>                                                                                                             |
|-----------------------------------------------------------|---------------------------|------------------------------------------------------------------------------------------------------------------------------------------|
| Random sequence generation (selection bias)               | High risk                 | The investigators describe a non-random component in the sequence generation process (Assignment performed by day of hospital admission) |
| Allocation concealment (selection bias)                   | Unclear risk              | Insufficient information to judge this item as low or high risk of bias                                                                  |
| Blinding of participants and personnel (performance bias) | Unclear risk              | Insufficient information to judge this item as low or high risk of bias                                                                  |
| Blinding of outcome assessment (detection bias)           | Unclear risk              | Insufficient information to judge this item as low or high risk of bias                                                                  |
| Incomplete outcome data (attrition bias)                  | Unclear risk              | Insufficient information to judge this item as low or high risk of bias                                                                  |
| Selective reporting (reporting bias)                      | Unclear risk              | Insufficient information to judge this item as low or high risk of bias                                                                  |
| Other bias                                                | Low risk                  | The study appears to be free of other sources of bias                                                                                    |

**Valles 2011**

| <b>Bias</b>                                               | <b>Authors' judgement</b> | <b>Support for judgement</b>                                                             |
|-----------------------------------------------------------|---------------------------|------------------------------------------------------------------------------------------|
| Random sequence generation (selection bias)               | Unclear risk              | No description of the methods used to allocate participants to treatment group was given |
| Allocation concealment (selection bias)                   | Unclear risk              | Insufficient information to judge this item as low or high risk of bias                  |
| Blinding of participants and personnel (performance bias) | Unclear risk              | Insufficient information to judge this item as low or high risk of bias                  |
| Blinding of outcome assessment (detection bias)           | Unclear risk              | Insufficient information to judge this item as low or high risk of bias                  |
| Incomplete outcome data (attrition bias)                  | Low risk                  | No missing outcome data                                                                  |
| Selective reporting (reporting bias)                      | Unclear risk              | Insufficient information to judge this item as low or high risk of bias                  |
| Other bias                                                | Low risk                  | The study appears to be free of other sources of bias                                    |

**Varela 2010**

| <b>Bias</b>                                               | <b>Authors' judgement</b> | <b>Support for judgement</b>                                                                           |
|-----------------------------------------------------------|---------------------------|--------------------------------------------------------------------------------------------------------|
| Random sequence generation (selection bias)               | Low risk                  | The investigators describe a random component in the sequence generation process (Random number table) |
| Allocation concealment (selection bias)                   | Unclear risk              | Insufficient information to judge this item as low or high risk of bias                                |
| Blinding of participants and personnel (performance bias) | Unclear risk              | Insufficient information to judge this item as low or high risk of bias                                |
| Blinding of outcome assessment (detection bias)           | Unclear risk              | Insufficient information to judge this item as low or high risk of bias                                |
| Incomplete outcome data (attrition bias)                  | Low risk                  | No missing outcome data                                                                                |
| Selective reporting (reporting bias)                      | Unclear risk              | Insufficient information to judge this item as low or high risk of bias                                |
| Other bias                                                | Low risk                  | The study appears to be free of other sources of bias                                                  |

**Vargas-Mena 2012**

| <b>Bias</b>                                               | <b>Authors' judgement</b> | <b>Support for judgement</b>                                                                                                                    |
|-----------------------------------------------------------|---------------------------|-------------------------------------------------------------------------------------------------------------------------------------------------|
| Random sequence generation (selection bias)               | Unclear risk              | No description of the methods used to allocate participants to treatment group was given                                                        |
| Allocation concealment (selection bias)                   | Unclear risk              | Insufficient information to judge this item as low or high risk of bias                                                                         |
| Blinding of participants and personnel (performance bias) | Low risk                  | Blinding of participants and key study personnel ensured, and unlikely that the blinding could have been broken                                 |
| Blinding of outcome assessment (detection bias)           | Low risk                  | No blinding of outcome assessment, but the review authors judge that the outcome measurement is not likely to be influenced by lack of blinding |
| Incomplete outcome data (attrition bias)                  | Low risk                  | No missing outcome data                                                                                                                         |
| Selective reporting (reporting bias)                      | Unclear risk              | Insufficient information to judge this item as low or high risk of bias                                                                         |
| Other bias                                                | Low risk                  | The study appears to be free of other sources of bias                                                                                           |

**Vega 2002**

| <b>Bias</b>                                               | <b>Authors' judgement</b> | <b>Support for judgement</b>                                                             |
|-----------------------------------------------------------|---------------------------|------------------------------------------------------------------------------------------|
| Random sequence generation (selection bias)               | Unclear risk              | No description of the methods used to allocate participants to treatment group was given |
| Allocation concealment (selection bias)                   | Unclear risk              | Insufficient information to judge this item as low or high risk of bias                  |
| Blinding of participants and personnel (performance bias) | Unclear risk              | Insufficient information to judge this item as low or high risk of bias                  |
| Blinding of outcome assessment (detection bias)           | Unclear risk              | Insufficient information to judge this item as low or high risk of bias                  |
| Incomplete outcome data (attrition bias)                  | Low risk                  | No missing outcome data                                                                  |
| Selective reporting (reporting bias)                      | Unclear risk              | Insufficient information to judge this item as low or high risk of bias                  |
| Other bias                                                | Low risk                  | The study appears to be free of other sources of bias                                    |



**Vidal 2000**

| <b>Bias</b>                                               | <b>Authors' judgement</b> | <b>Support for judgement</b>                                                                                    |
|-----------------------------------------------------------|---------------------------|-----------------------------------------------------------------------------------------------------------------|
| Random sequence generation (selection bias)               | Unclear risk              | No description of the methods used to allocate participants to treatment group was given                        |
| Allocation concealment (selection bias)                   | Unclear risk              | Insufficient information to judge this item as low or high risk of bias                                         |
| Blinding of participants and personnel (performance bias) | Low risk                  | Blinding of participants and key study personnel ensured, and unlikely that the blinding could have been broken |
| Blinding of outcome assessment (detection bias)           | Low risk                  | Blinding of outcome assessment ensured, and unlikely that the blinding could have been broken                   |
| Incomplete outcome data (attrition bias)                  | Low risk                  | No missing outcome data                                                                                         |
| Selective reporting (reporting bias)                      | Unclear risk              | Insufficient information to judge this item as low or high risk of bias                                         |
| Other bias                                                | Low risk                  | The study appears to be free of other sources of bias                                                           |

**Vincent 2007**

| <b>Bias</b>                                               | <b>Authors' judgement</b> | <b>Support for judgement</b>                                                                                    |
|-----------------------------------------------------------|---------------------------|-----------------------------------------------------------------------------------------------------------------|
| Random sequence generation (selection bias)               | Low risk                  | The investigators describe a random component in the sequence generation process (Random number list)           |
| Allocation concealment (selection bias)                   | Unclear risk              | Insufficient information to judge this item as low or high risk of bias                                         |
| Blinding of participants and personnel (performance bias) | Low risk                  | Blinding of participants and key study personnel ensured, and unlikely that the blinding could have been broken |
| Blinding of outcome assessment (detection bias)           | Low risk                  | Blinding of outcome assessment ensured, and unlikely that the blinding could have been broken                   |
| Incomplete outcome data (attrition bias)                  | Low risk                  | No missing outcome data                                                                                         |
| Selective reporting (reporting bias)                      | Unclear risk              | Insufficient information to judge this item as low or high risk of bias                                         |
| Other bias                                                | Low risk                  | The study appears to be free of other sources of bias                                                           |
